# Supplementary material
Source: PubMed Central journal article supplement (PMC10527043)

**A**

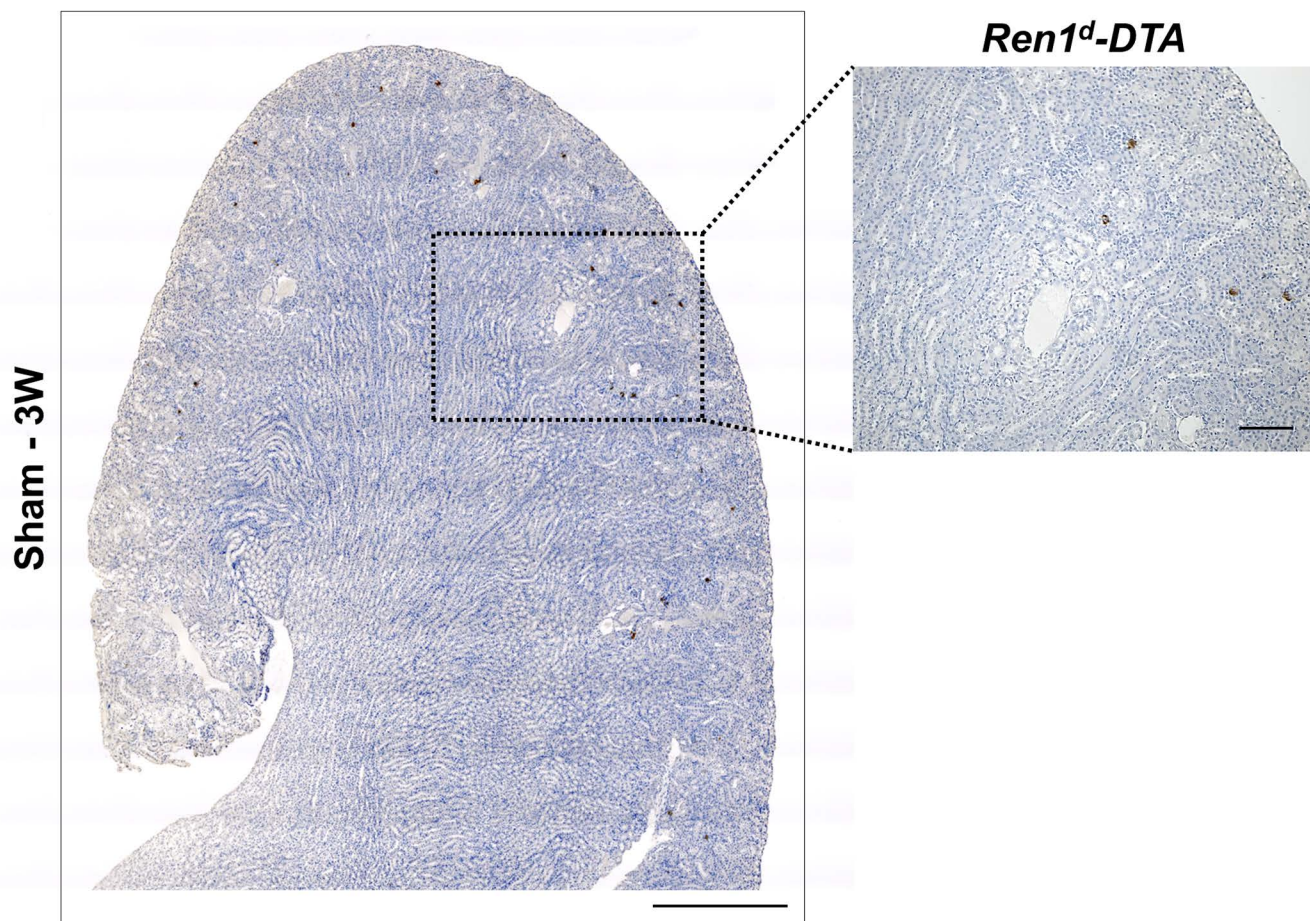

**B**

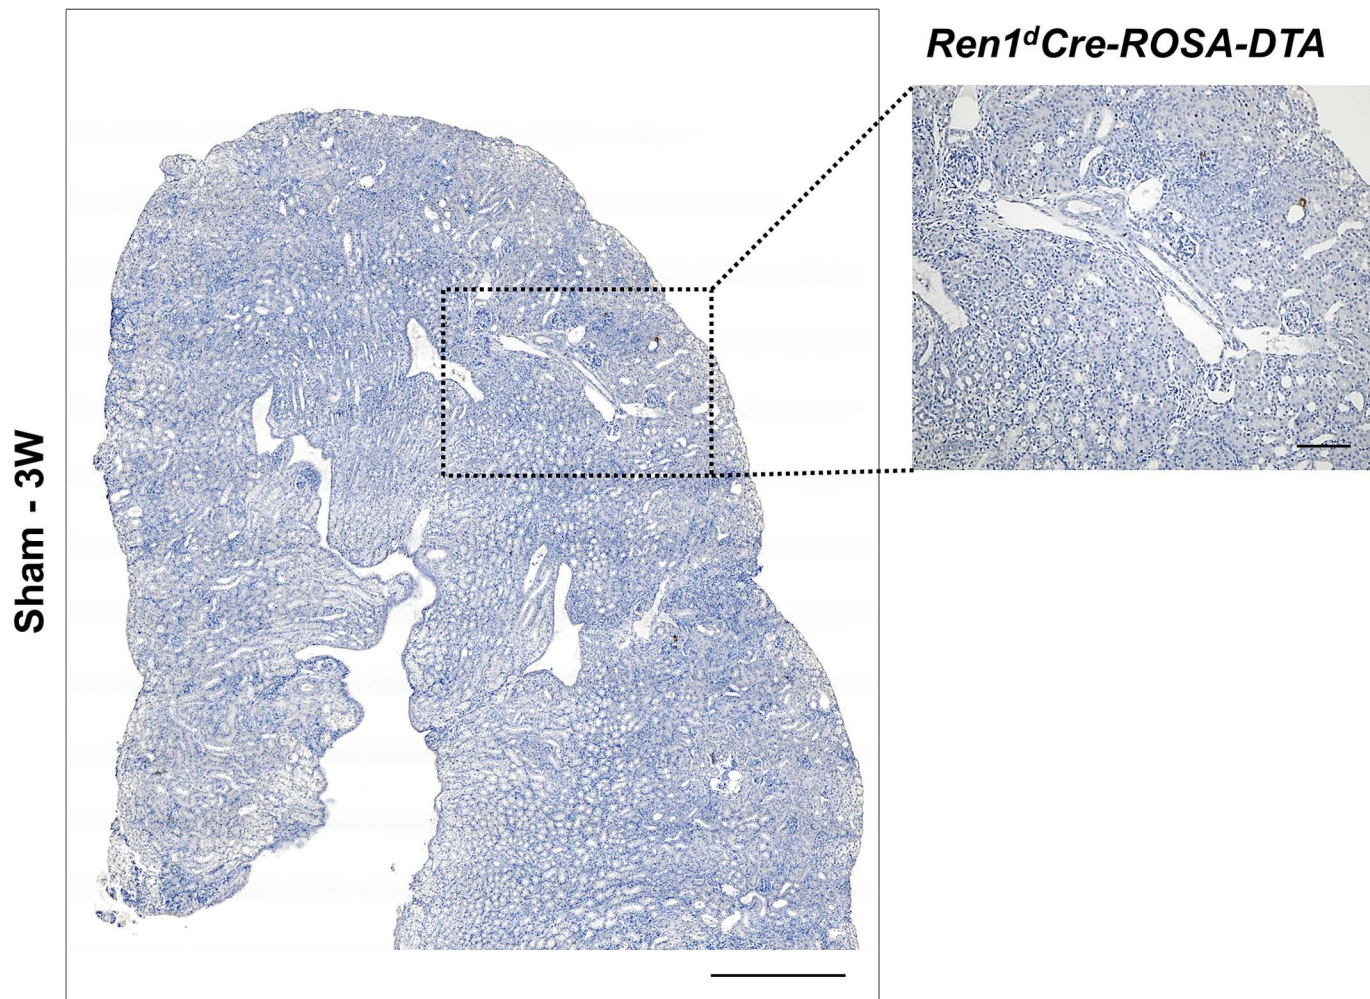



C

Obstructed - 3W

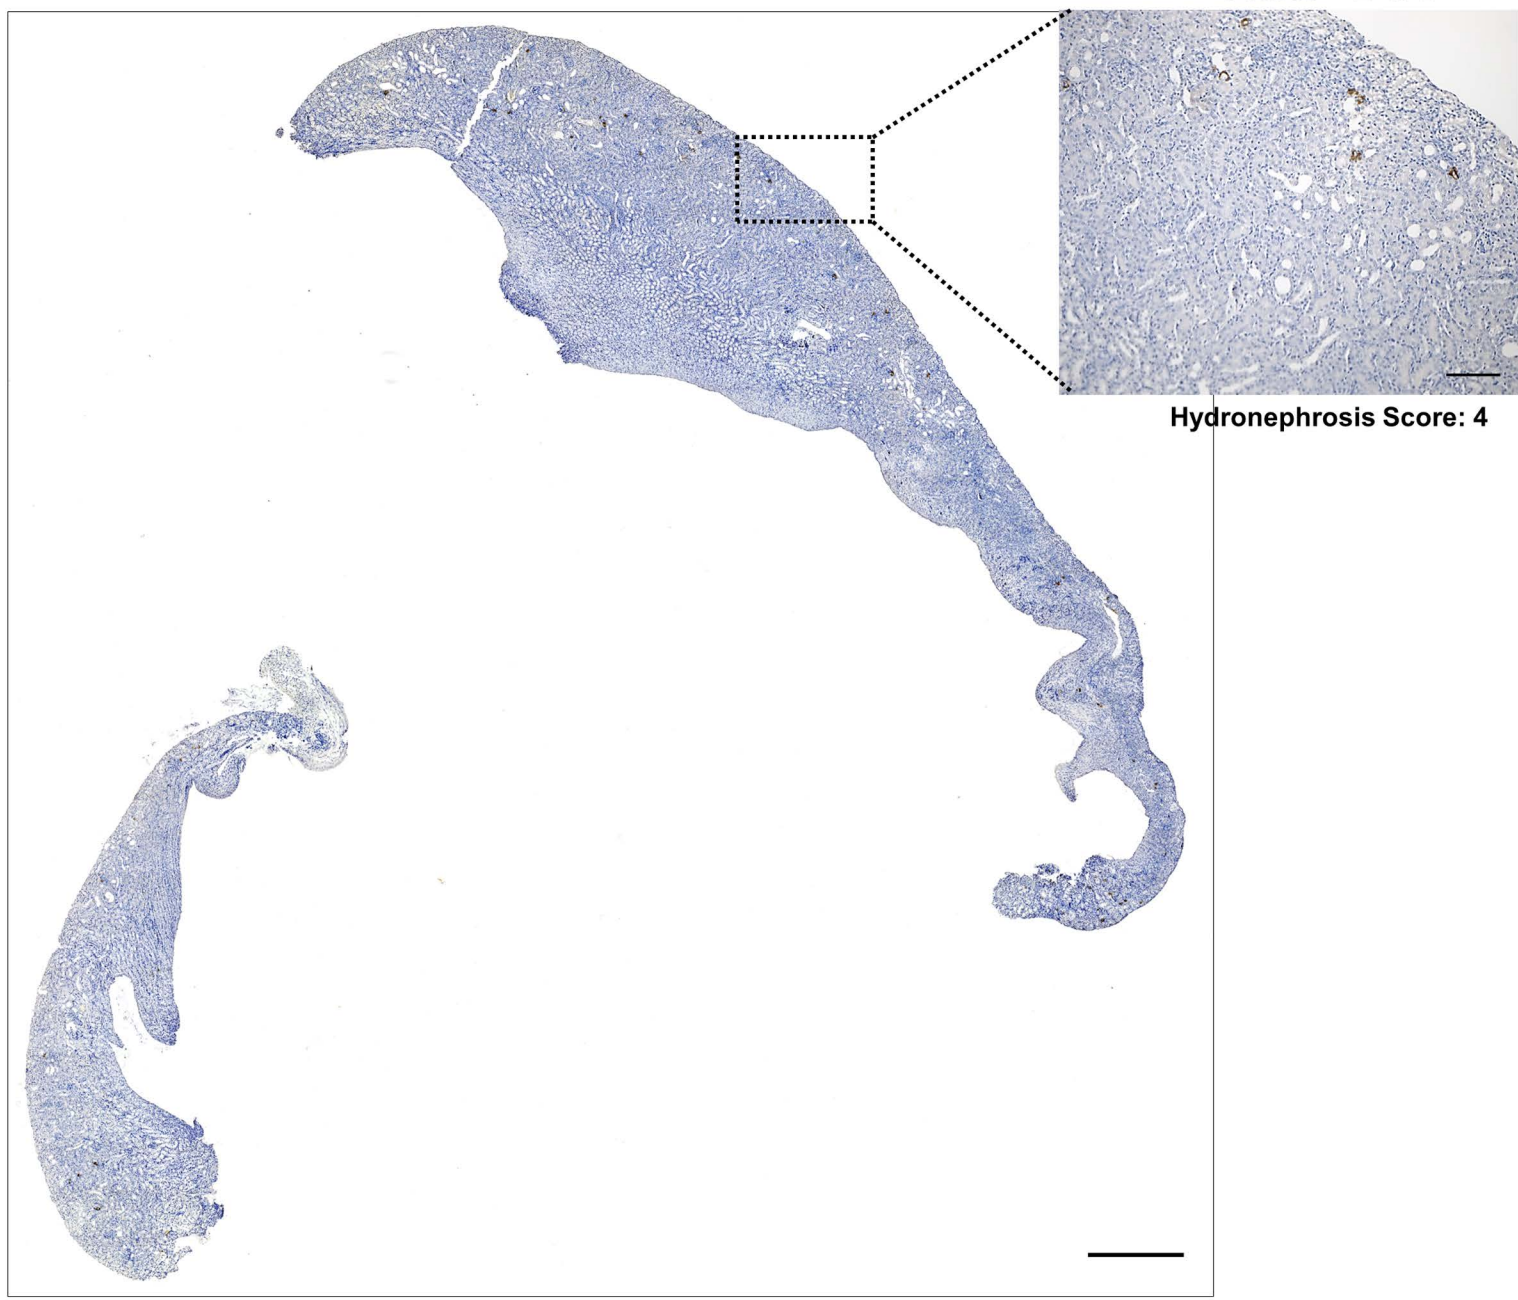

*Ren1<sup>d</sup>-DTA*

Hydronephrosis Score: 4

D

Obstructed - 3W

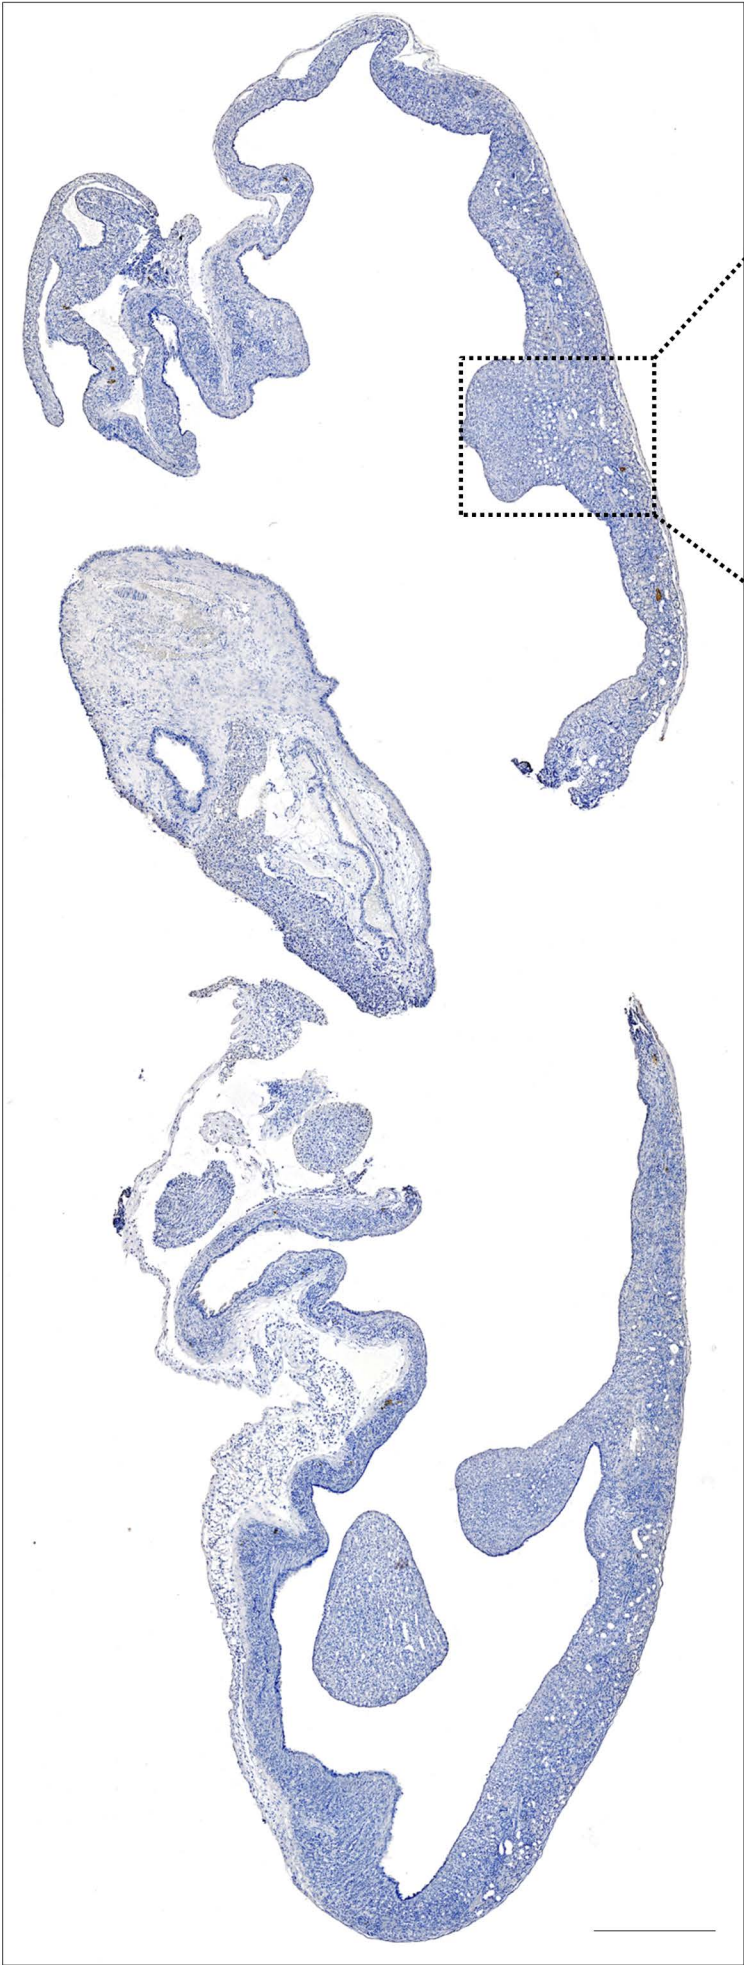

*Ren1<sup>d</sup>Cre-ROSA-DTA*

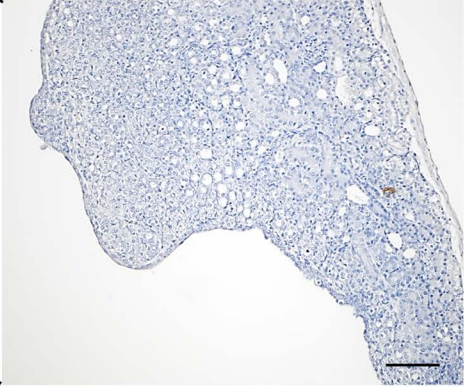

Hydronephrosis Score: 4



**E**

**Post-Release - 2W**

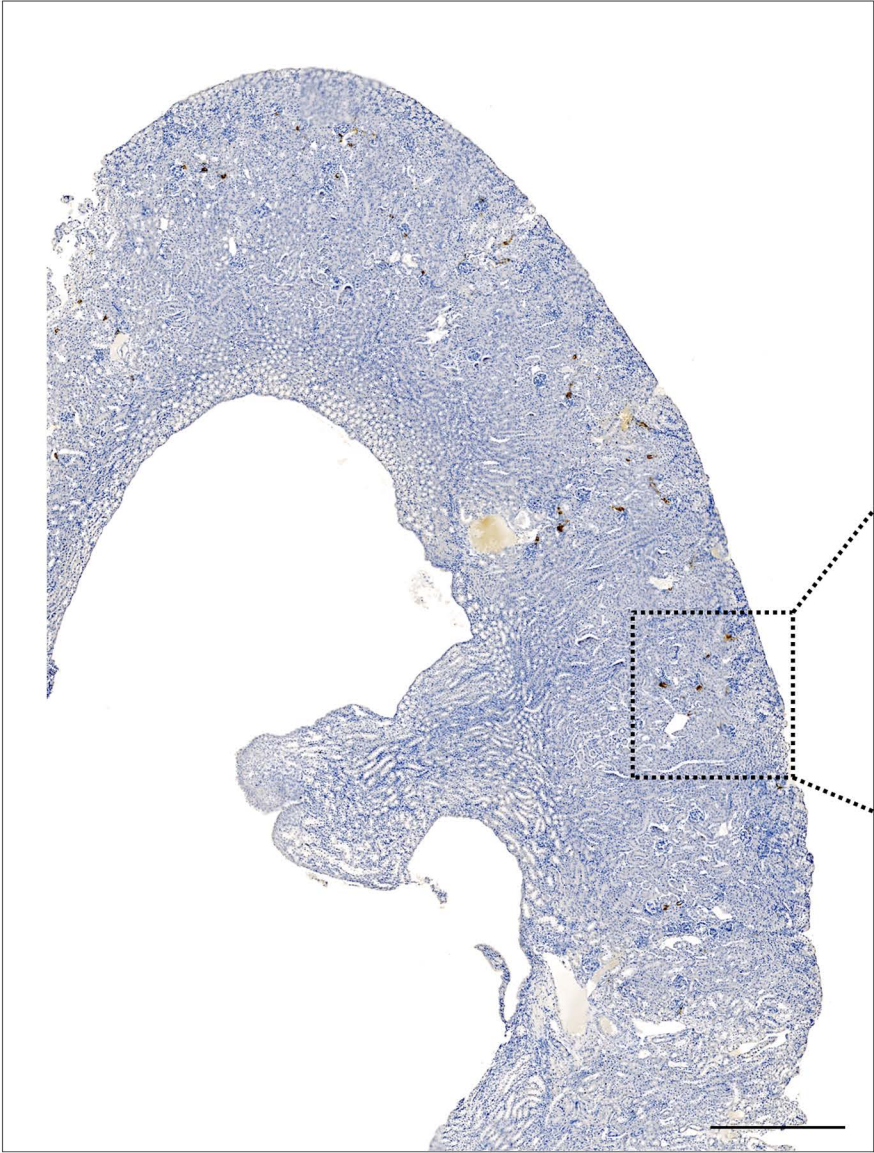

***Ren1<sup>d</sup>-DTA***

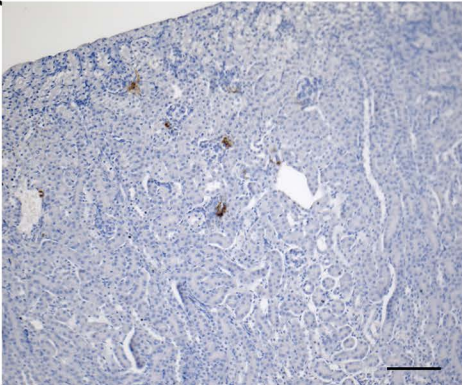

**Hydronephrosis Score  
3 → 2**

**F**

**Post-Release - 2W**

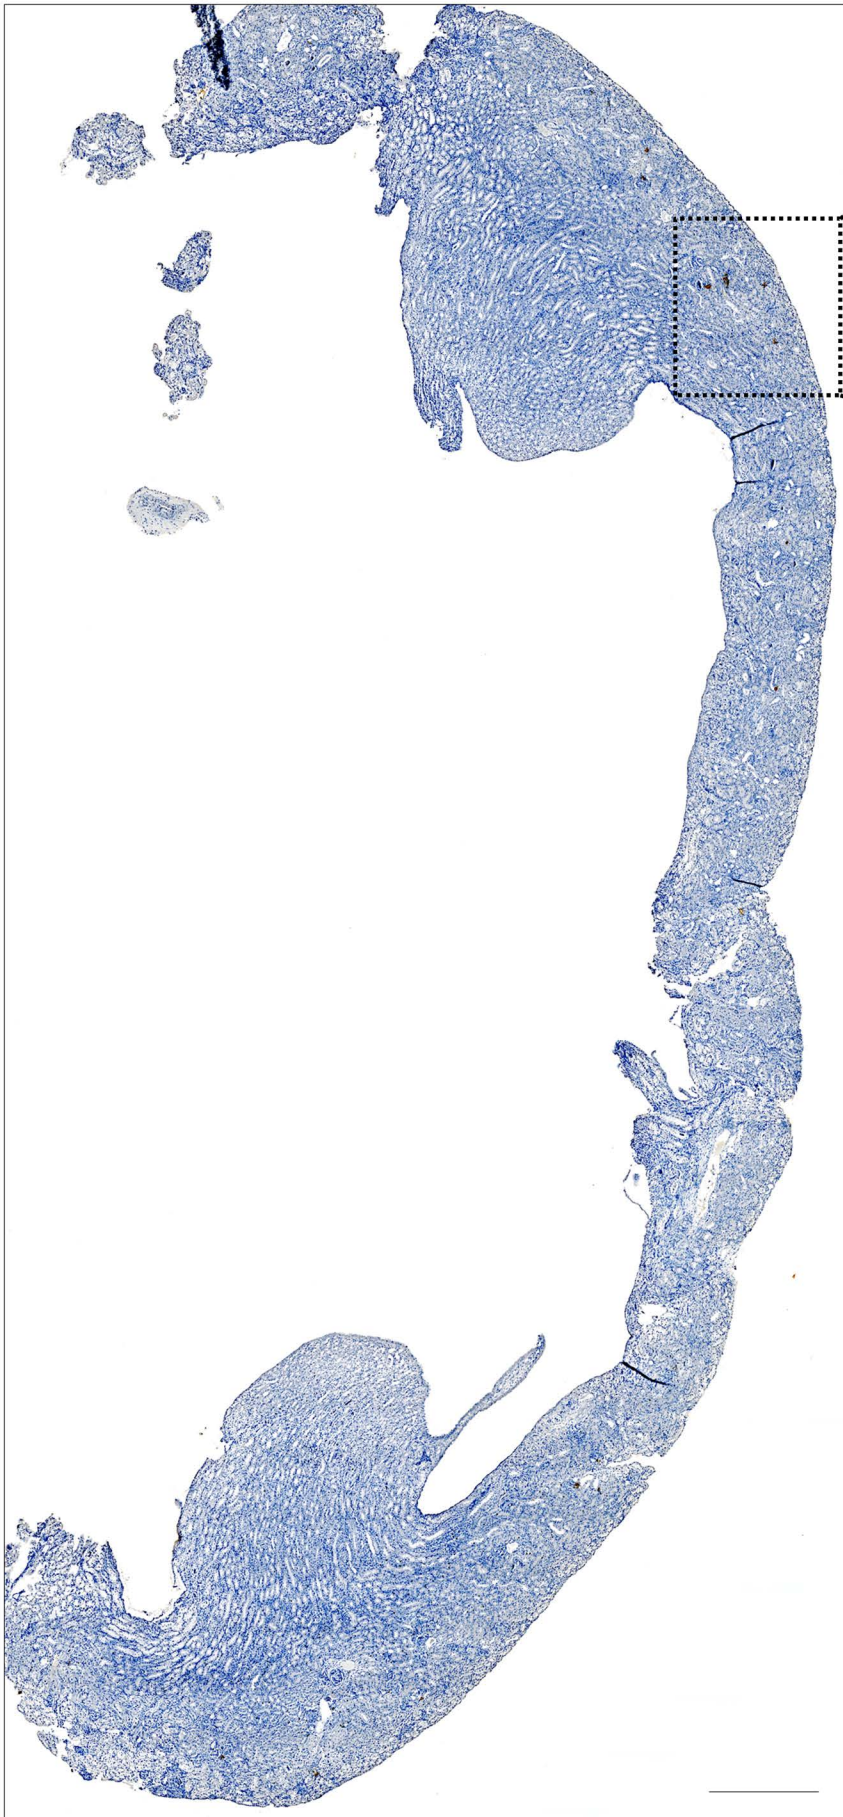

***Ren1<sup>d</sup>Cre-ROSA-DTA***

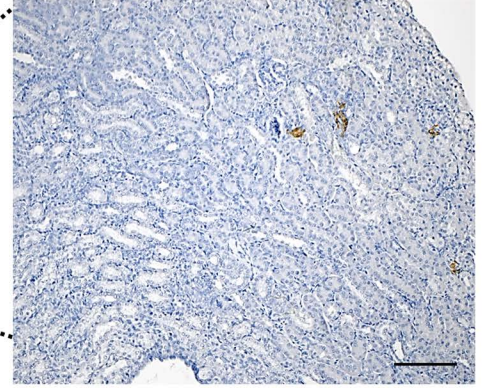

**Hydronephrosis Score  
3 → 2.5**

**G**

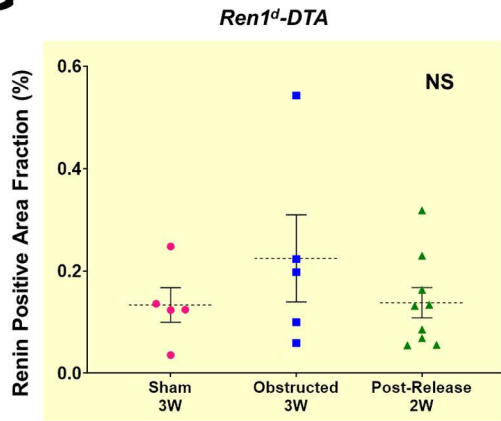

**H**

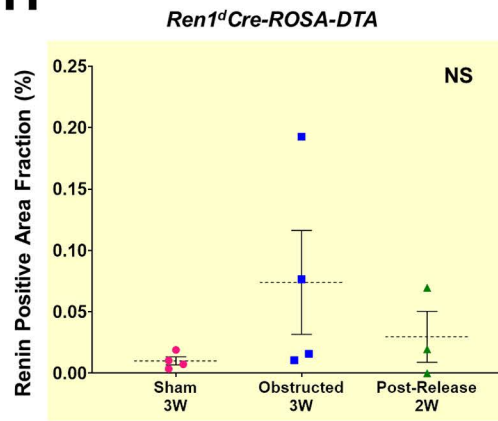

**I**

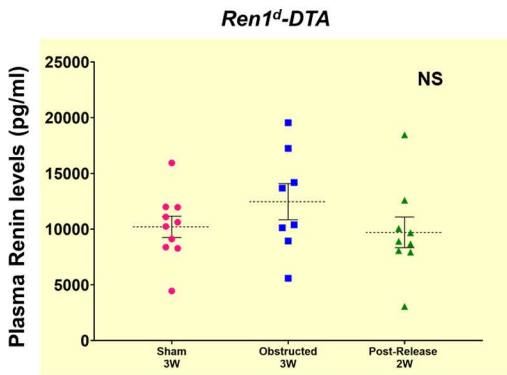

**J**

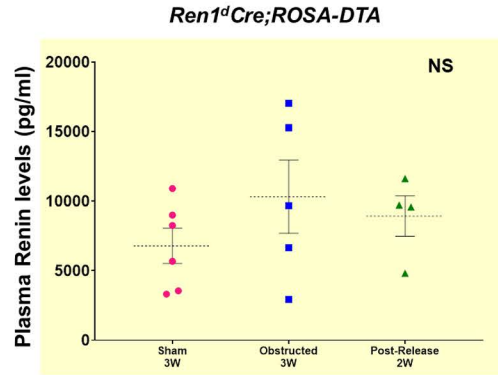

**K**

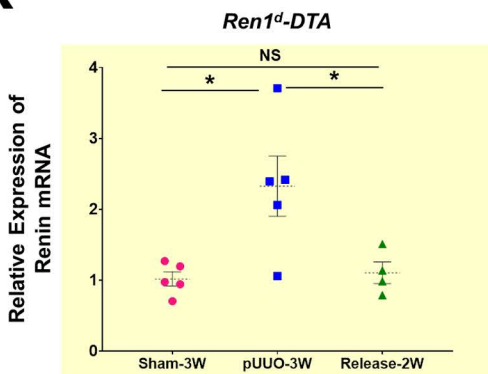

**L**

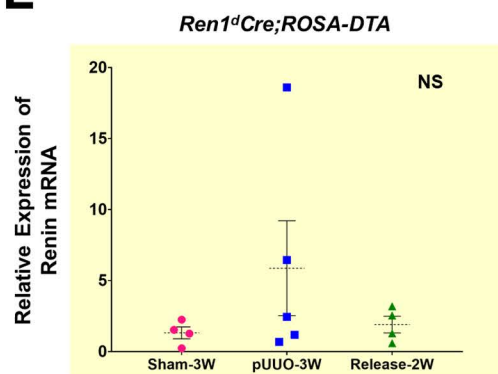

Supplement: NIHMS1909147-supplement-Fig_S9.pdf [file NIHMS1909147-supplement-Fig_S9.pdf]
