# Supplementary material
Source: PubMed Central journal article supplement (PMC10527043)
Supplement: NIHMS1909147-supplement-Fig_S2.pdf [file NIHMS1909147-supplement-Fig_S2.pdf]

A

Ren1<sup>d</sup>Cre;mTmG  
Sham - 3W

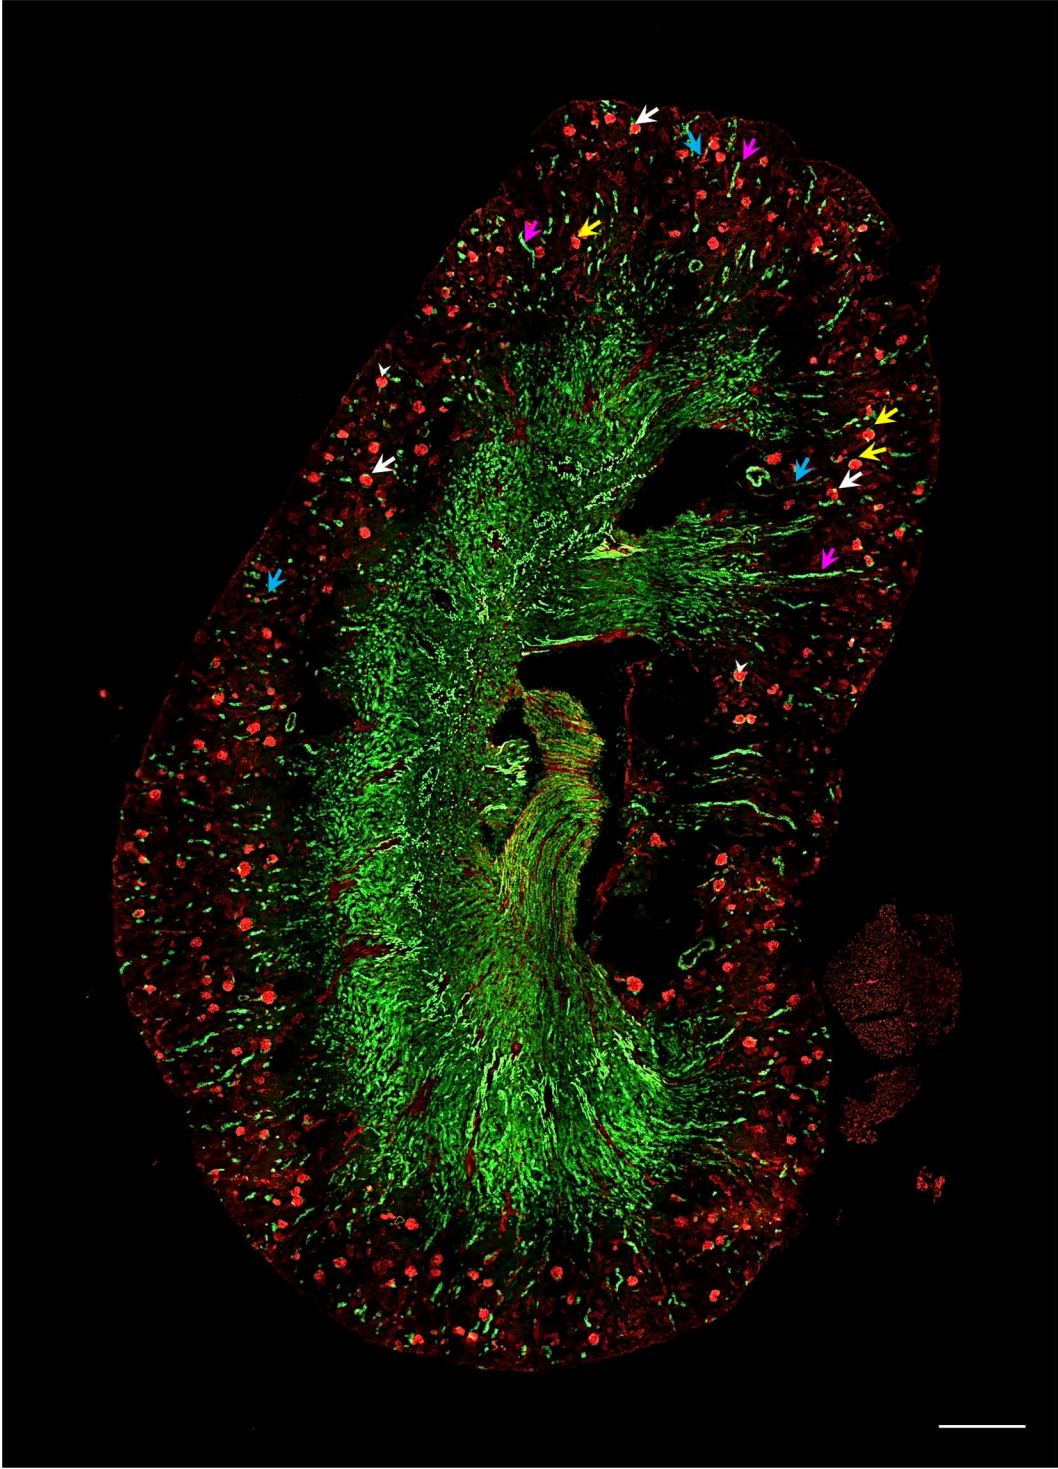

B

Obstructed - 3W

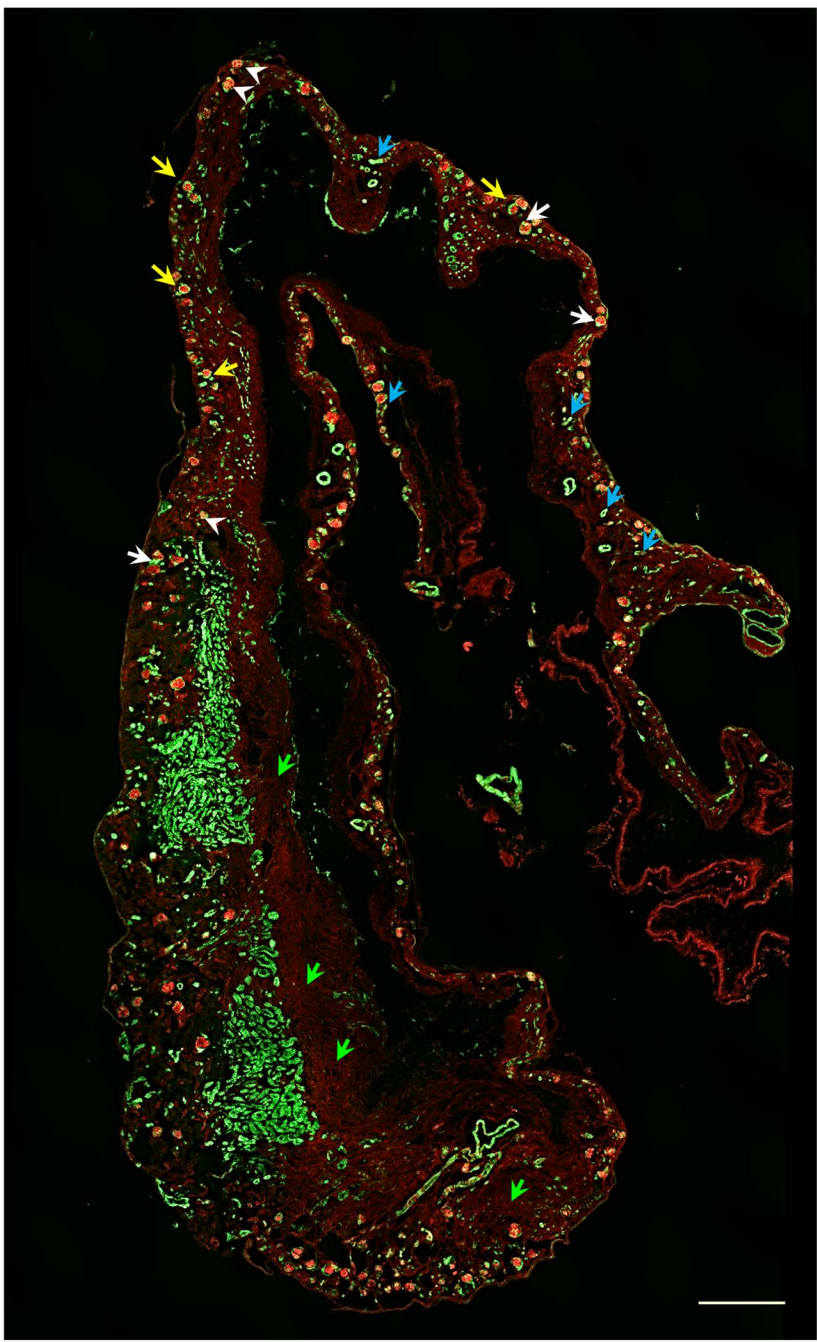

Hydronephrosis Score: 3.5

C

**Ren1<sup>d</sup>Cre;mTmG  
Post-Release - 2W**

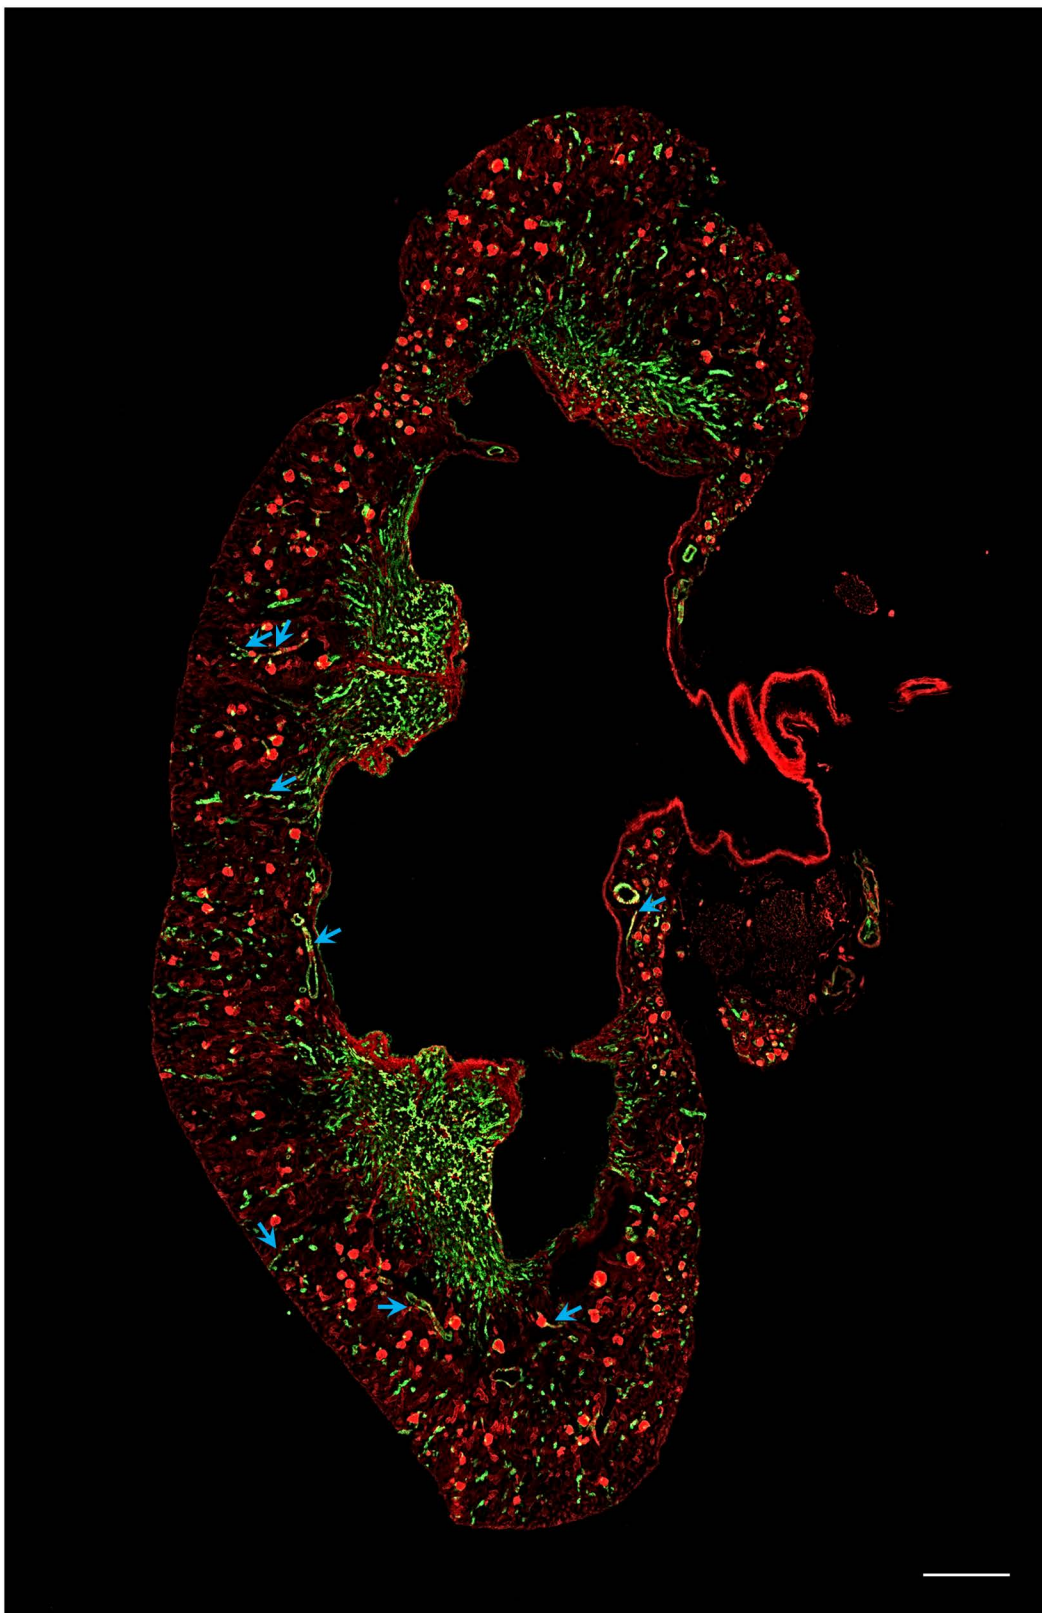

**Hydronephrosis Score: 3.5 → 2.5**
