# Supplementary material
Source: PubMed Central journal article supplement (PMC10527043)

**A***Ren1<sup>d</sup>-DTA*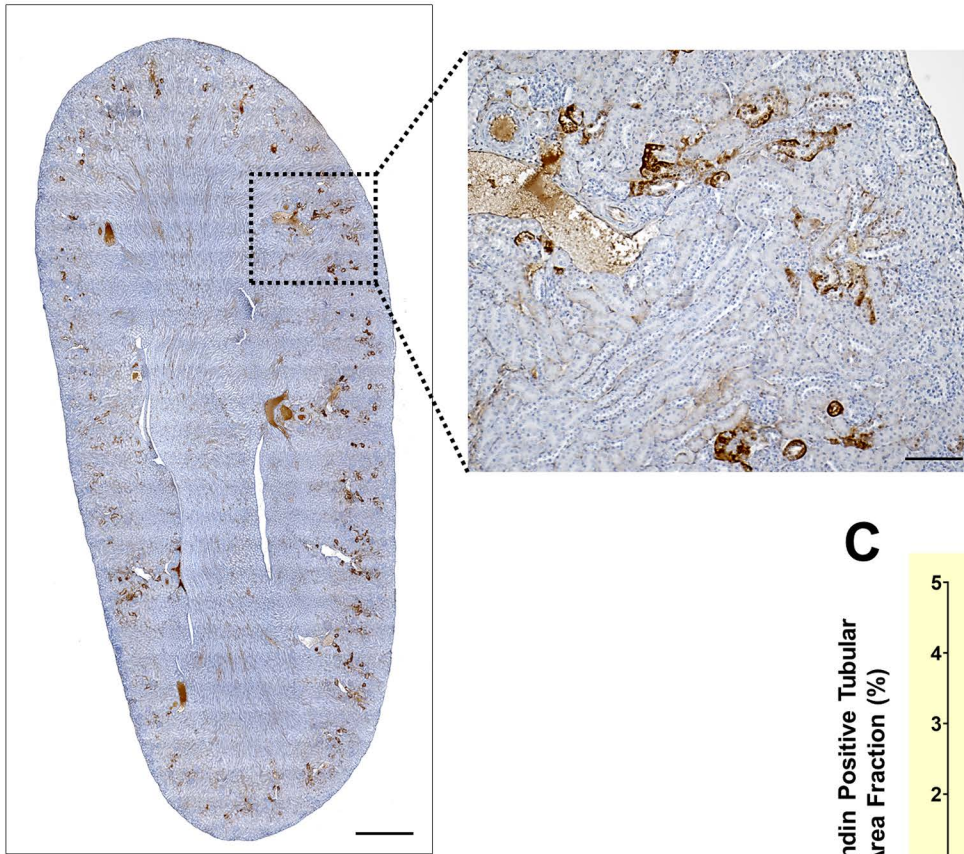**C**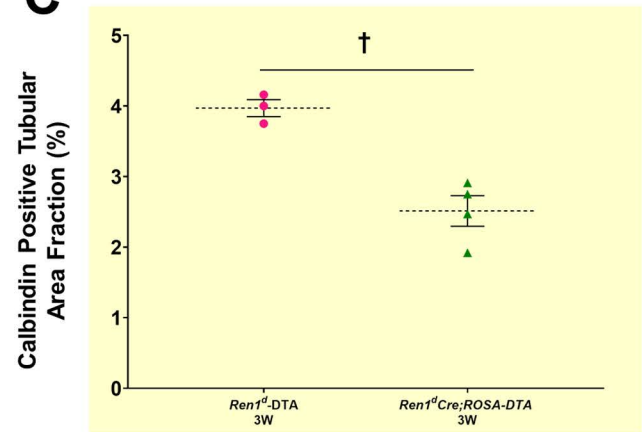**B***Ren1<sup>d</sup>Cre;ROSA-DTA*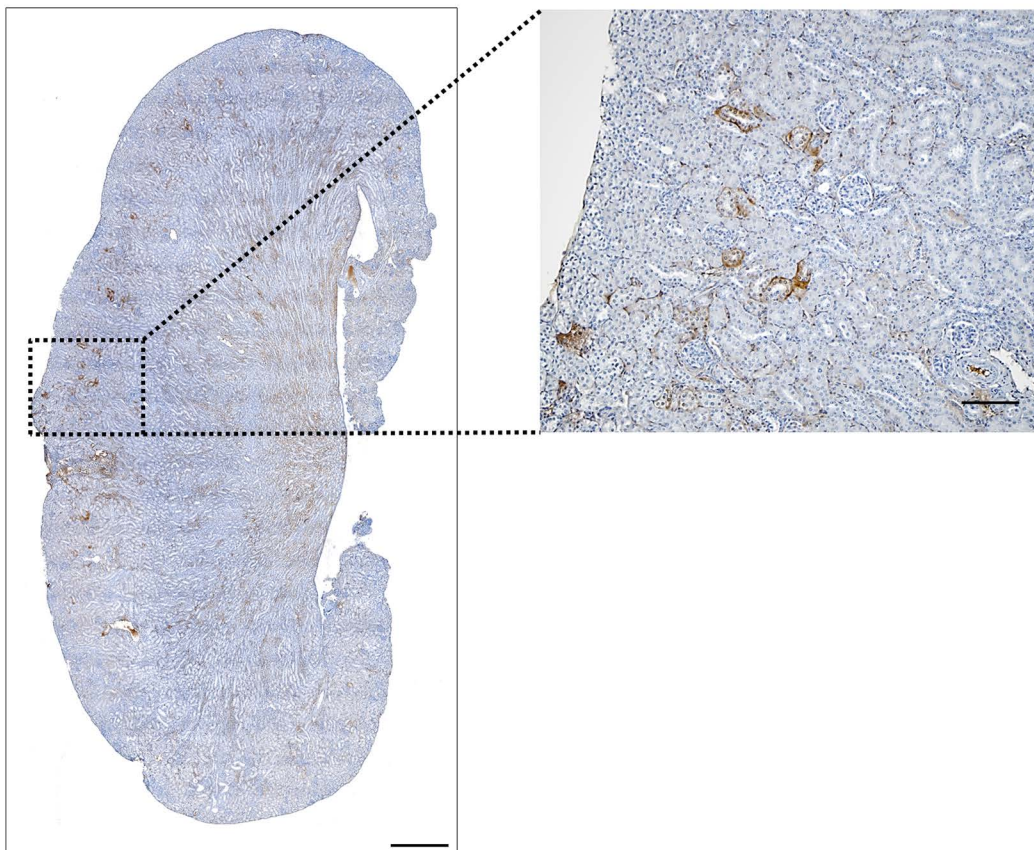



**D***Ren1<sup>d</sup>-DTA*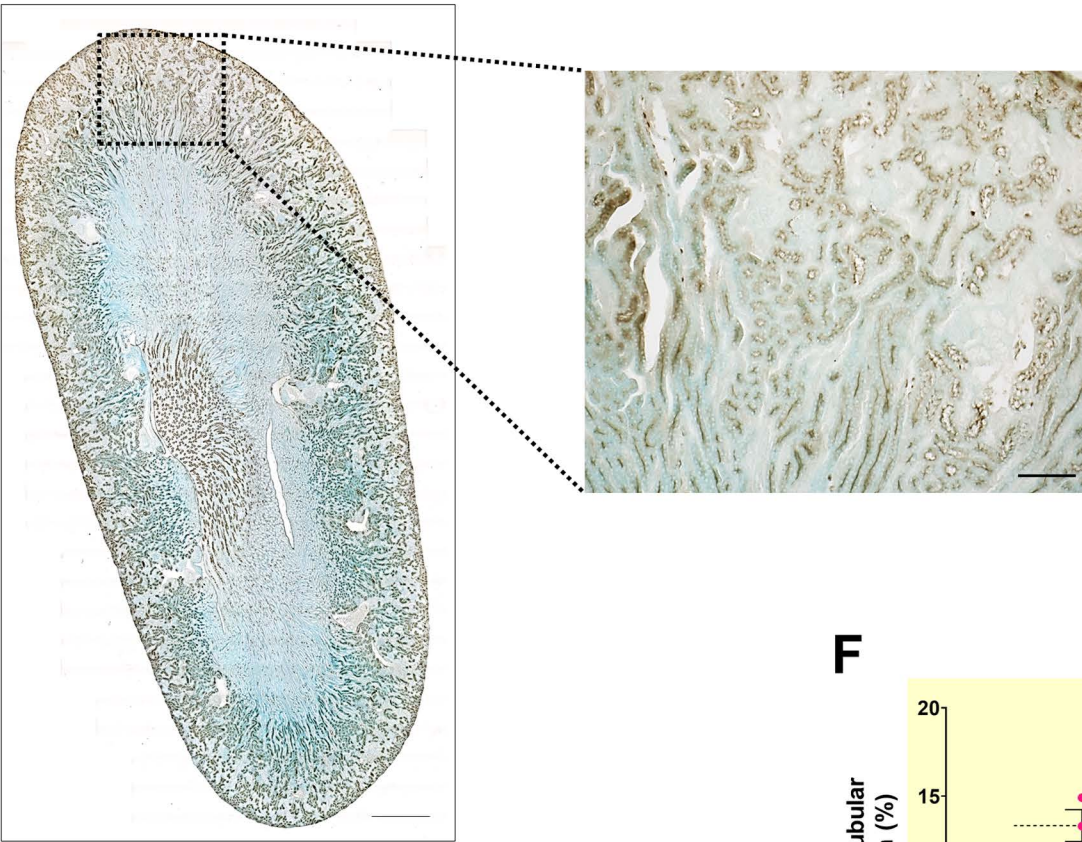**E***Ren1<sup>d</sup>Cre;ROSA-DTA*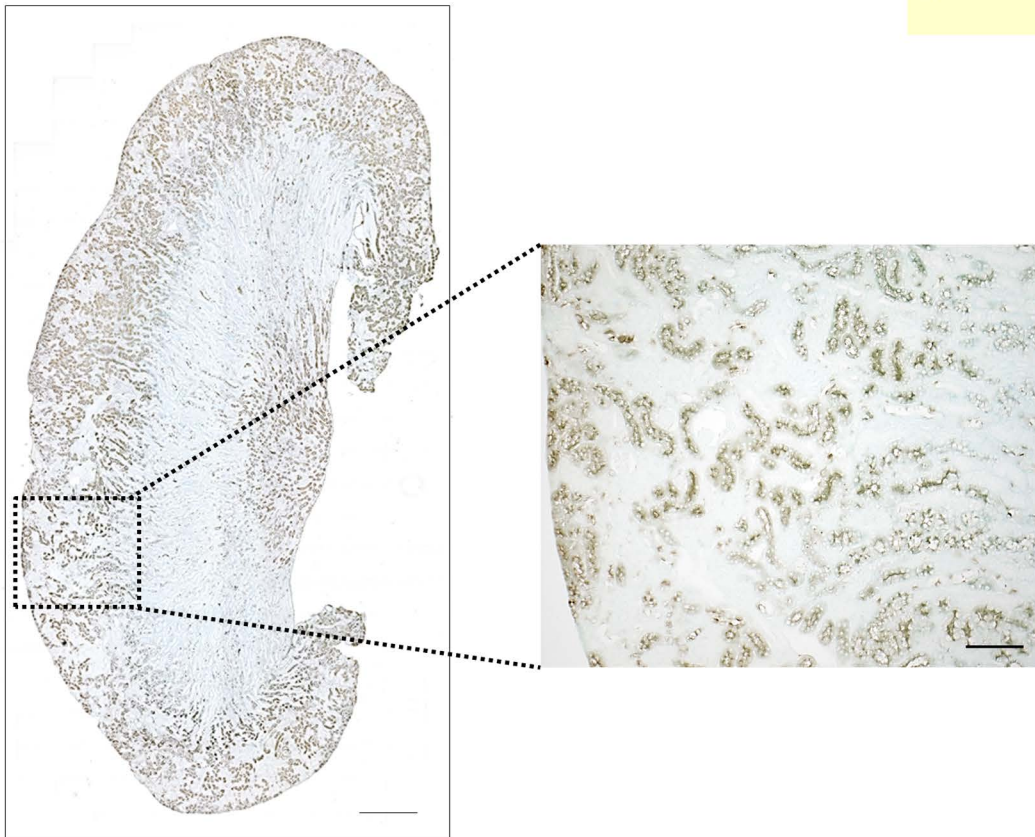**F**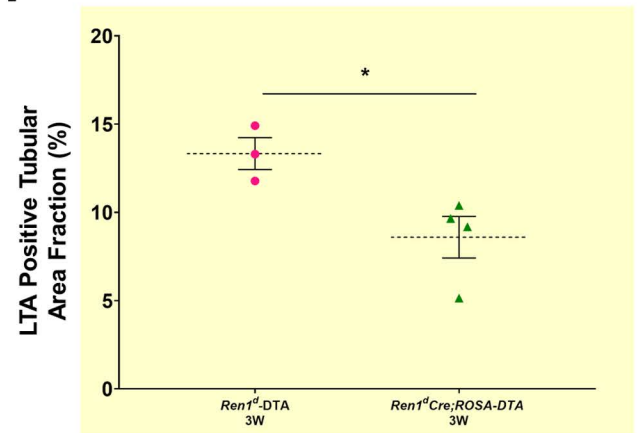

**G*****Ren1<sup>d</sup>-DTA***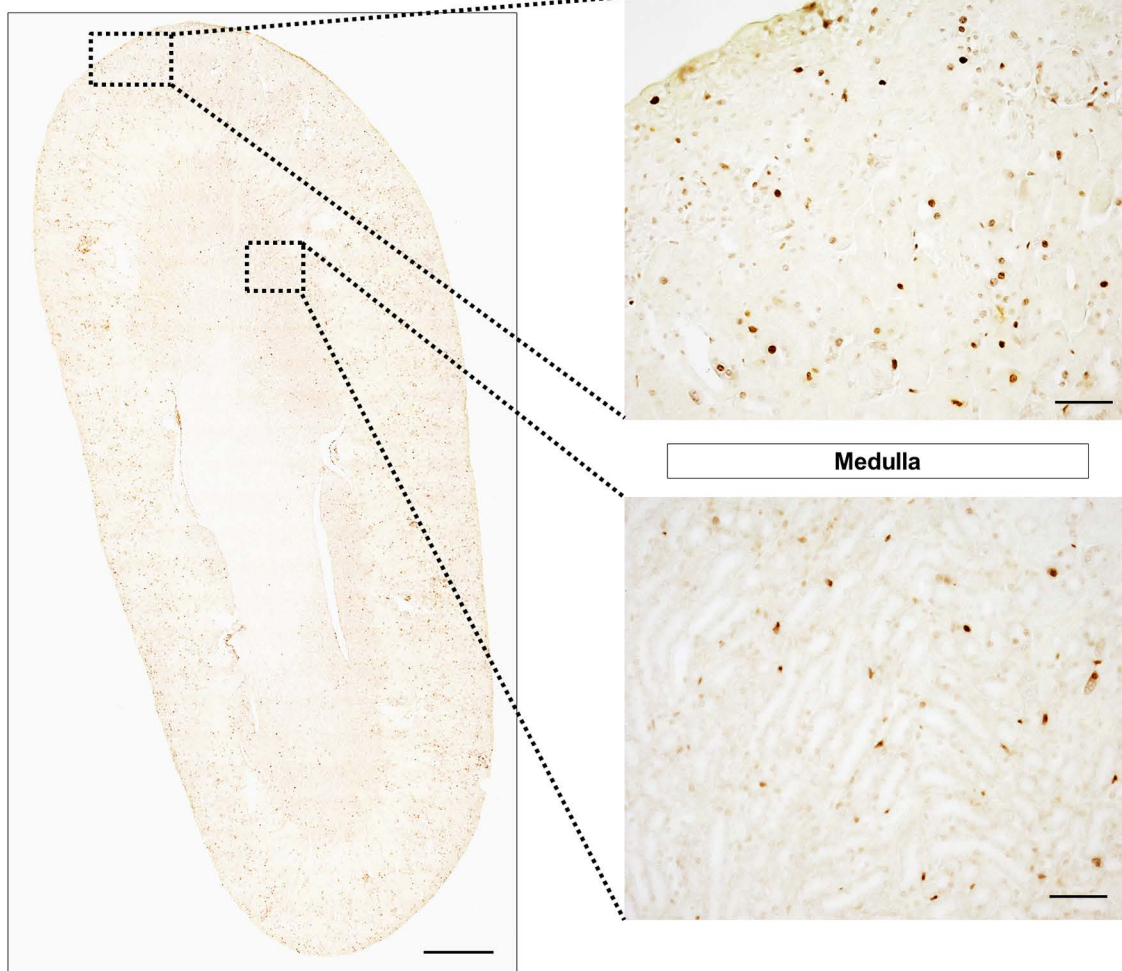**H*****Ren1<sup>d</sup>Cre;ROSA-DTA***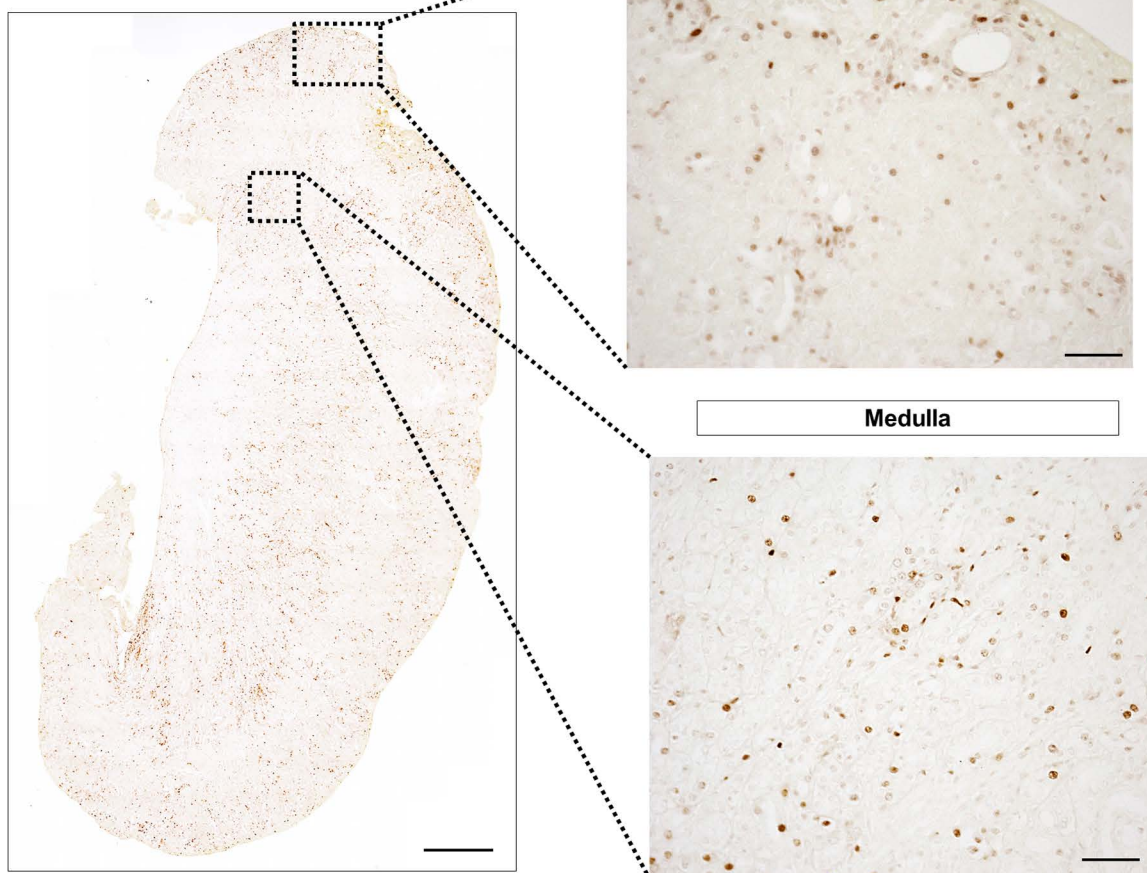



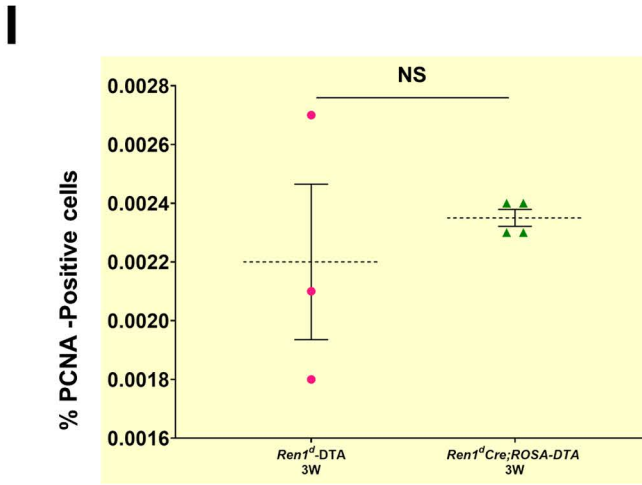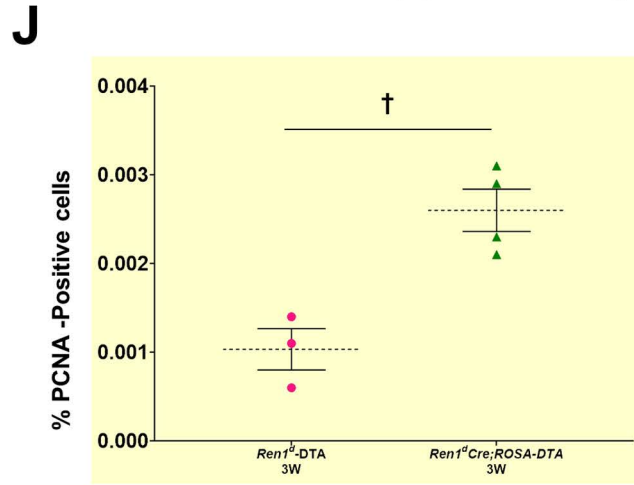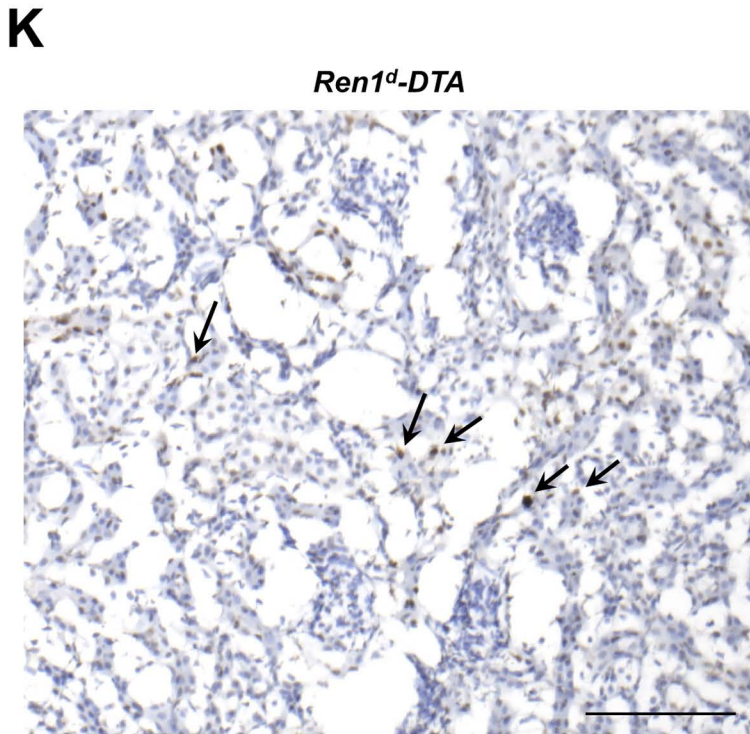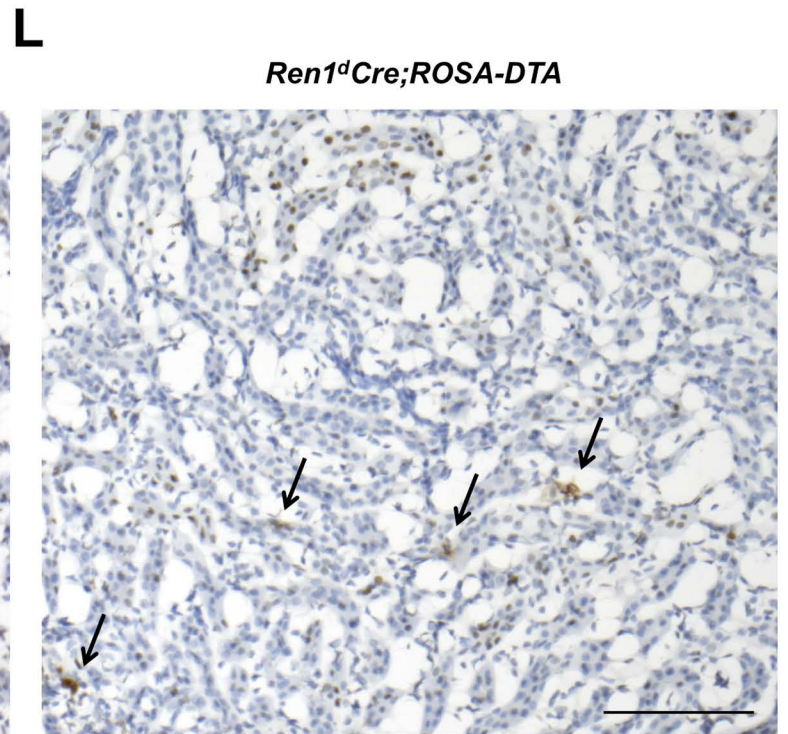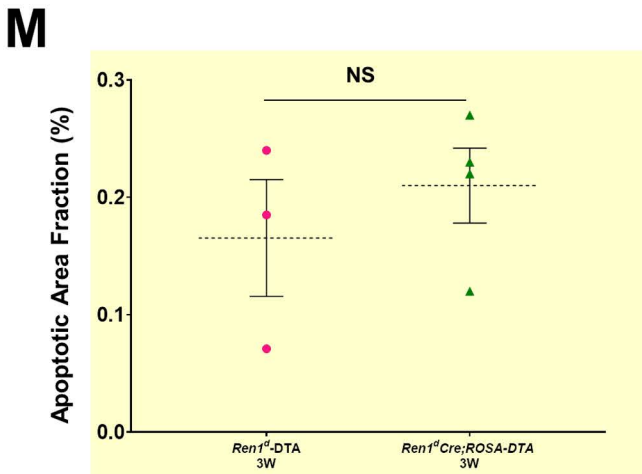

Supplement: NIHMS1909147-supplement-Fig_S4.pdf [file NIHMS1909147-supplement-Fig_S4.pdf]
