# Supplementary material
Source: PubMed Central journal article supplement (PMC10527043)
Supplement: NIHMS1909147-supplement-Fig_S8.pdf [file NIHMS1909147-supplement-Fig_S8.pdf]

**A**

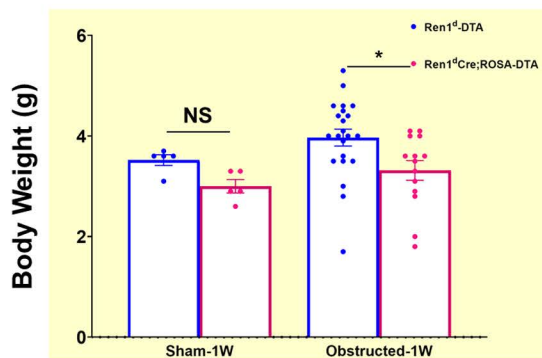

**B**

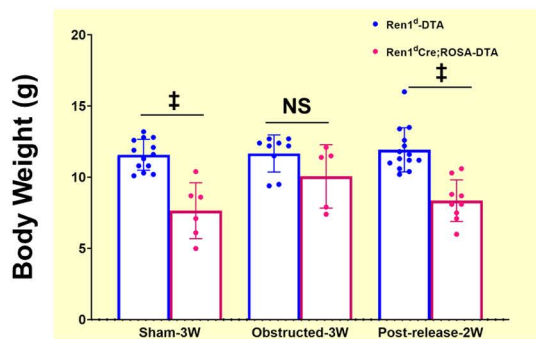

**C**

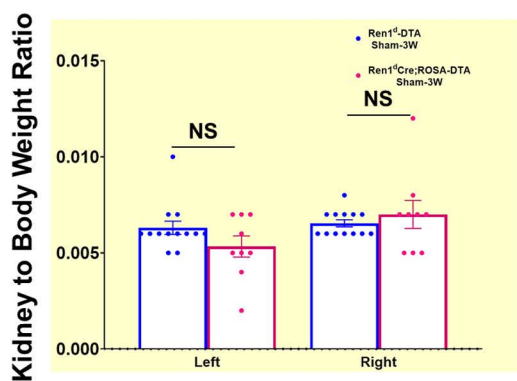

**D**

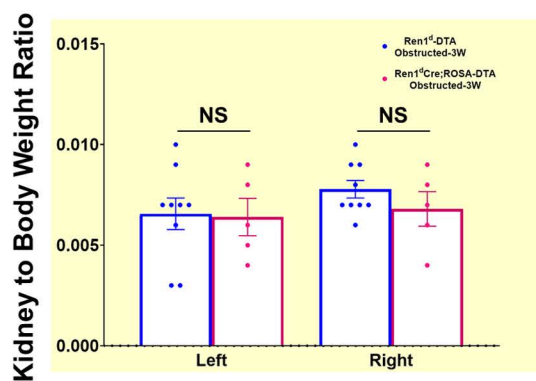

**E**

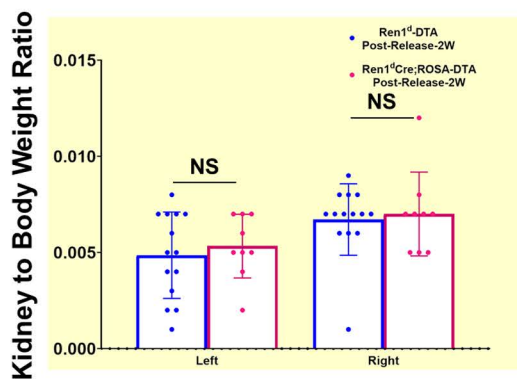

**F**

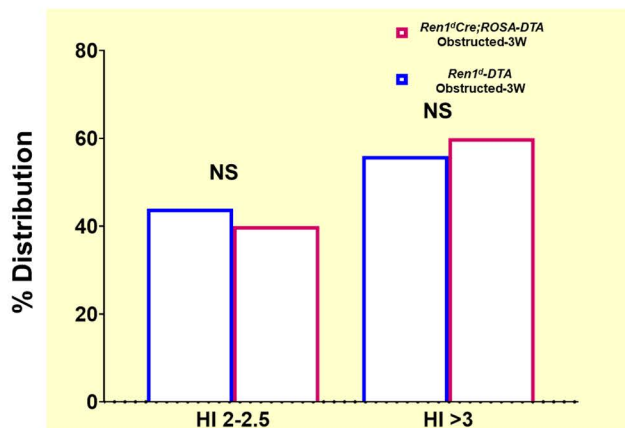

**G**

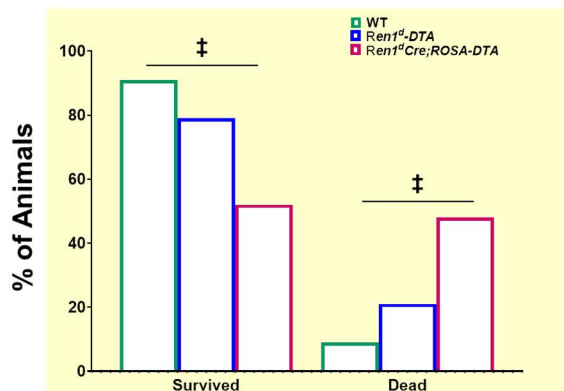

**H**

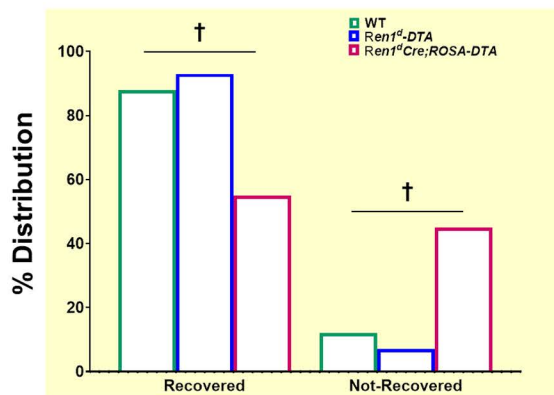

***Ren1<sup>d</sup>-DTA: Obstructed-3W***

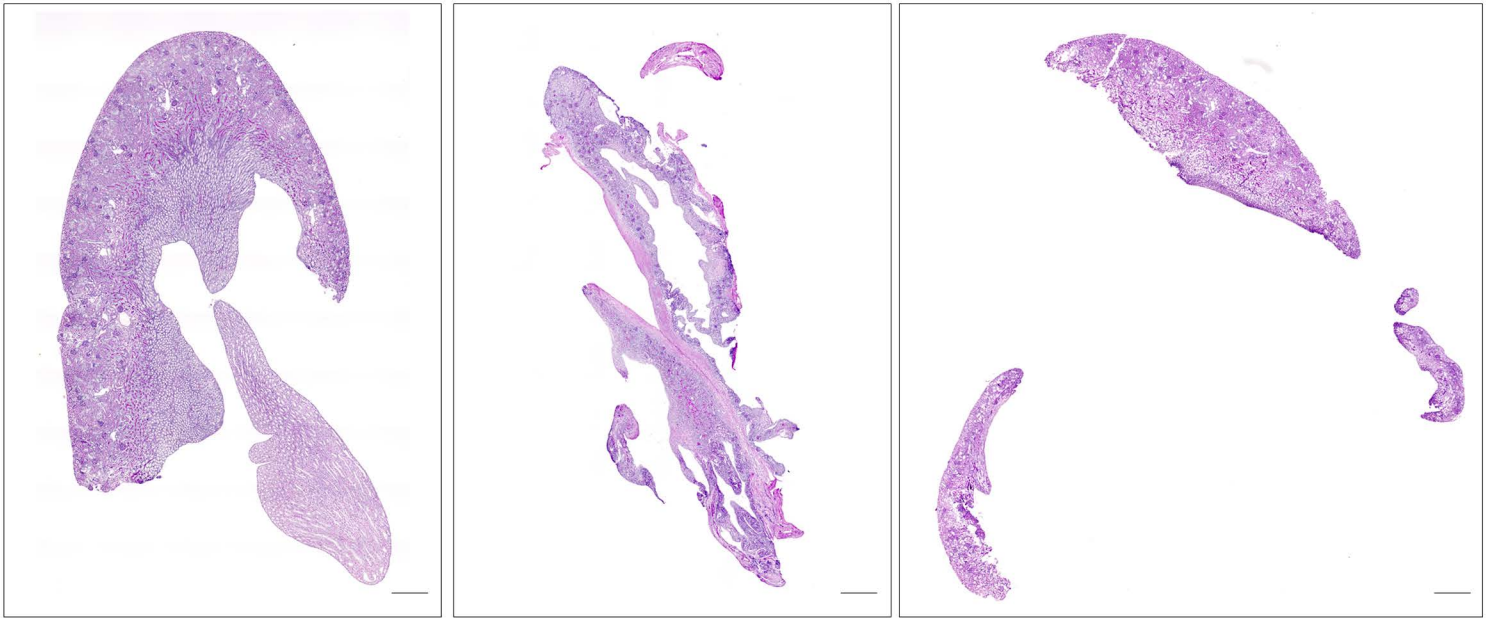

Hydronephrosis Score: 2.5

Hydronephrosis Score: 4.0

Hydronephrosis Score: 4.0

***Ren1<sup>d</sup>Cre;ROSA-DTA: Obstructed-3W***

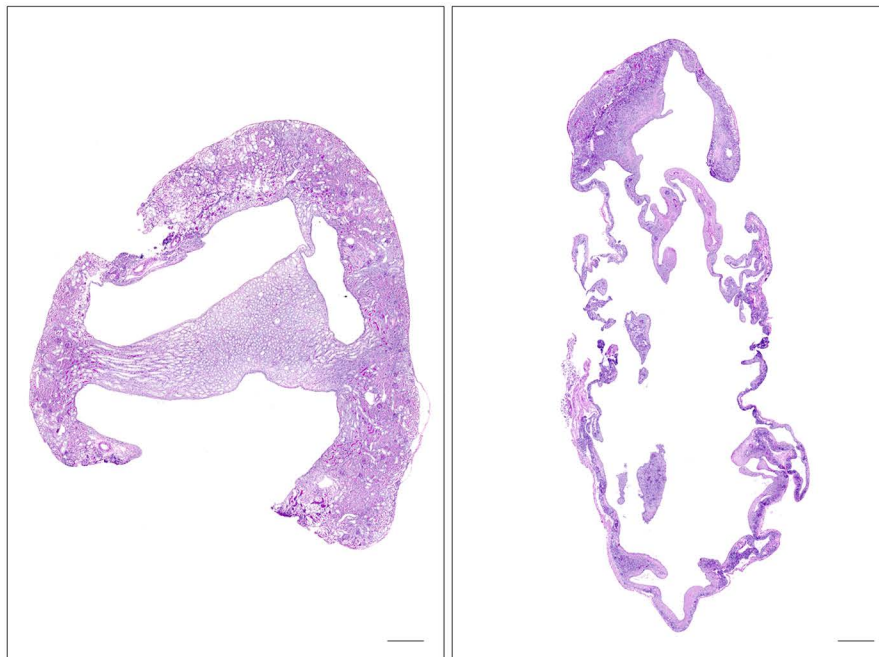

Hydronephrosis Score: 2.5

Hydronephrosis Score: 4.0

J

Post-Release-2W

*Ren1<sup>d</sup>-DTA*

*Ren1<sup>d</sup>Cre;ROSA-DTA*

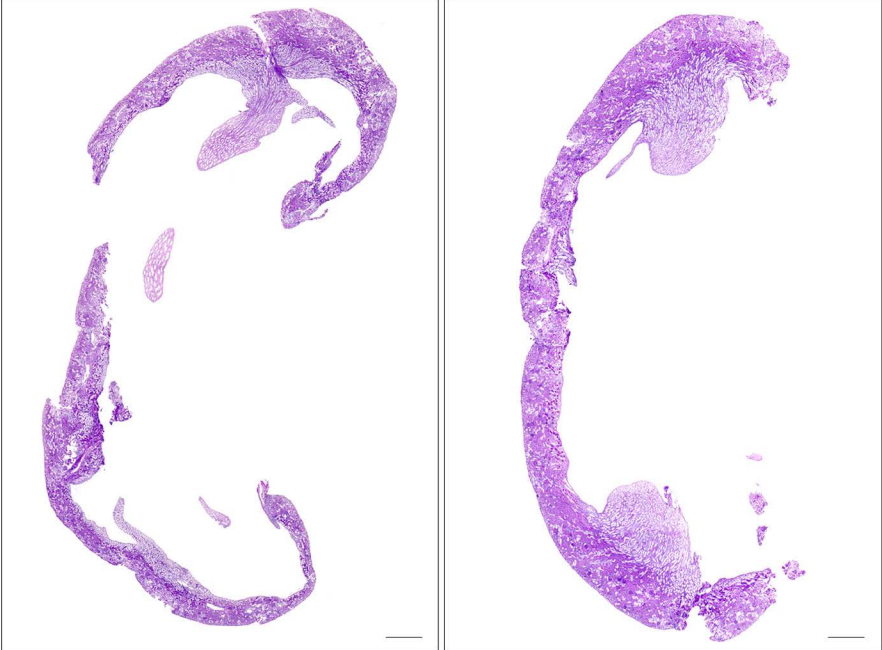

Hydronephrosis Score  
3 → 2.5

Hydronephrosis Score  
3 → 2.5
