# Supplementary material
Source: PubMed Central journal article supplement (PMC10527043)

A

Sham - 3W

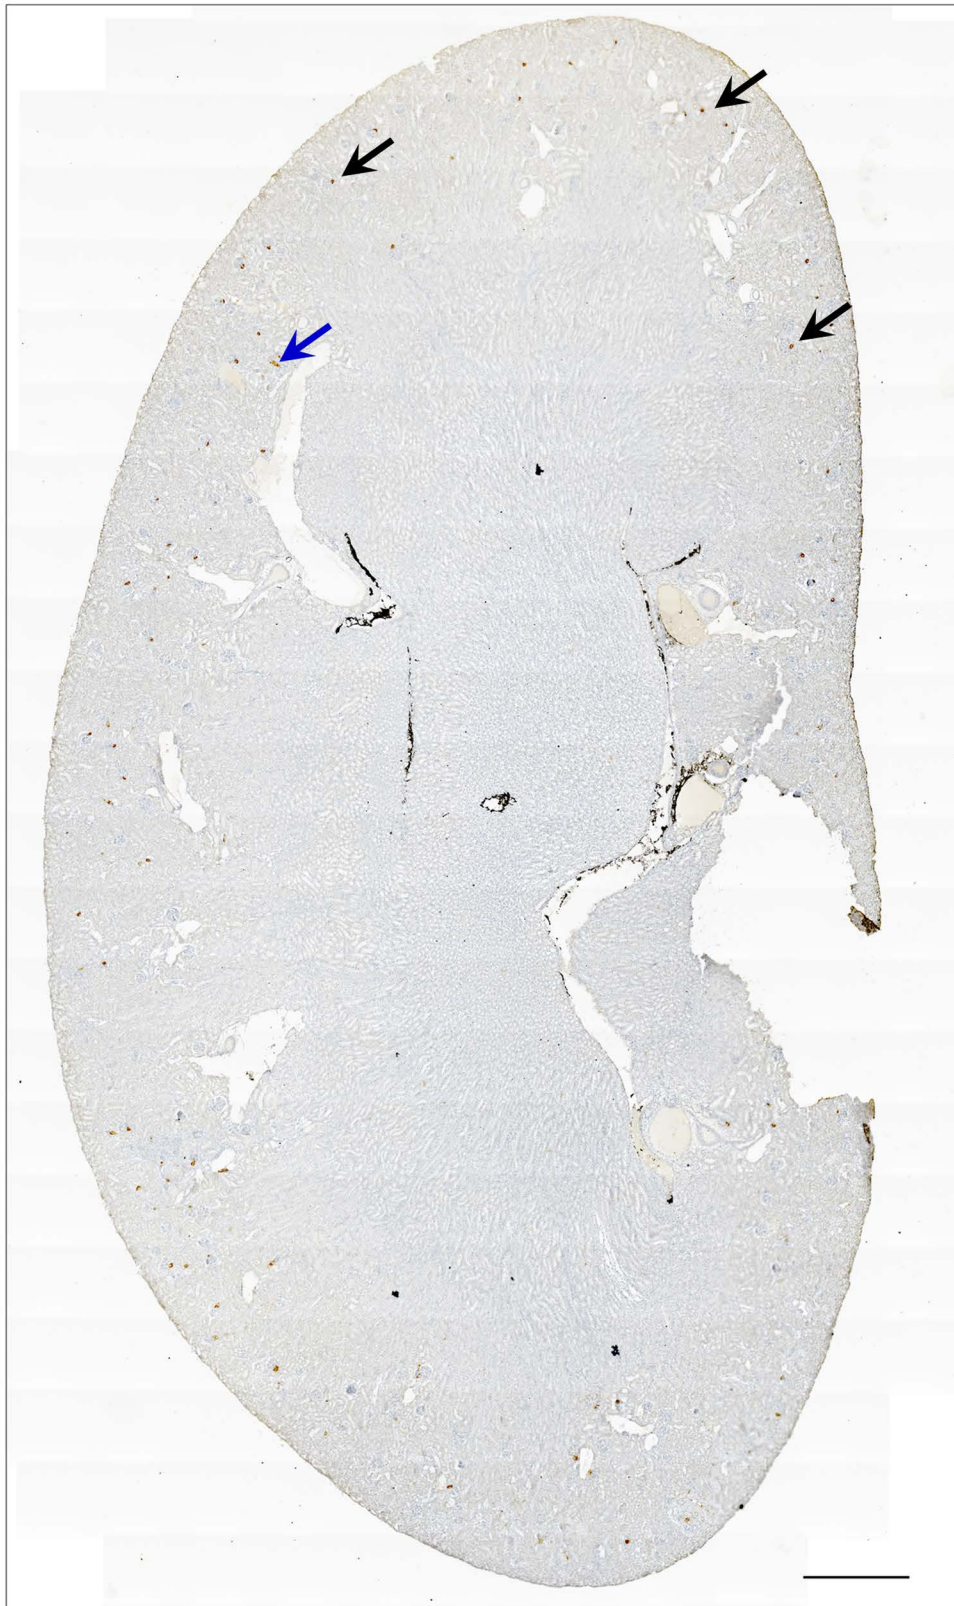

B

Obstructed - 3W - Hydronephrosis Score:3

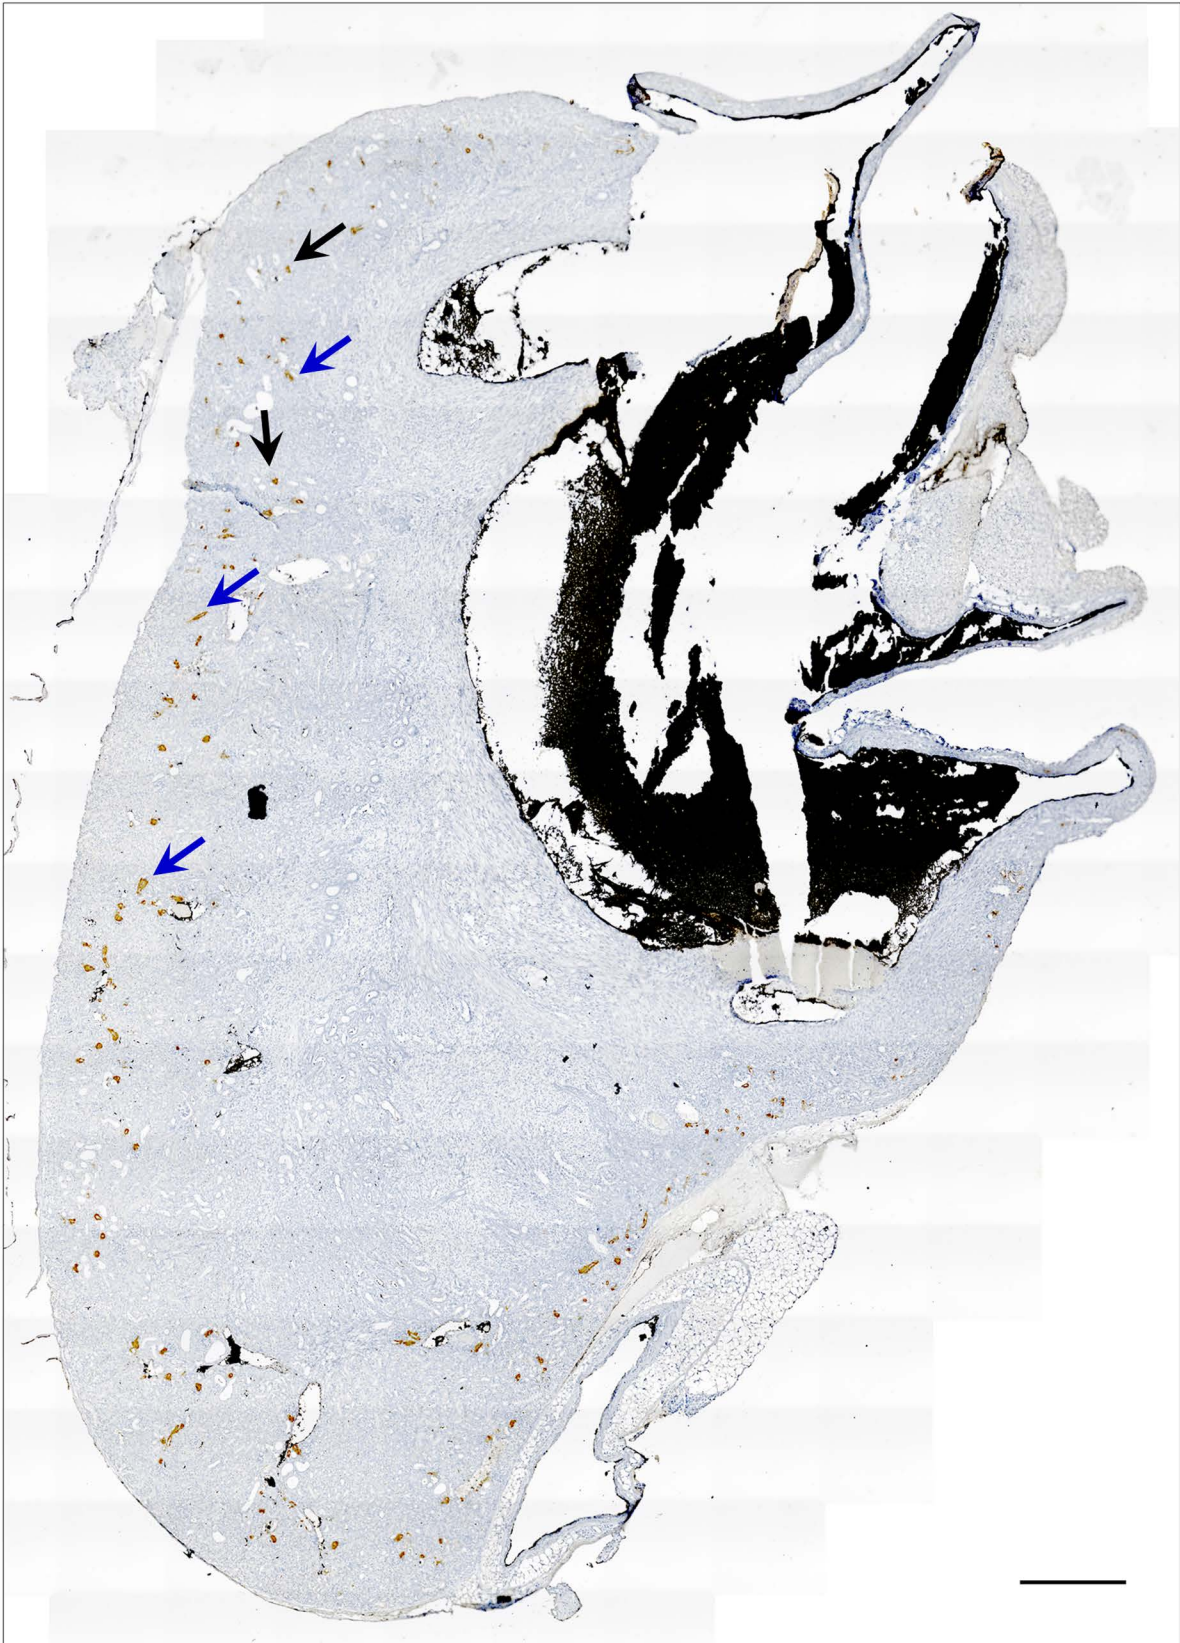



C

Post-Release - 2W - Hydronephrosis Score 3 → 1

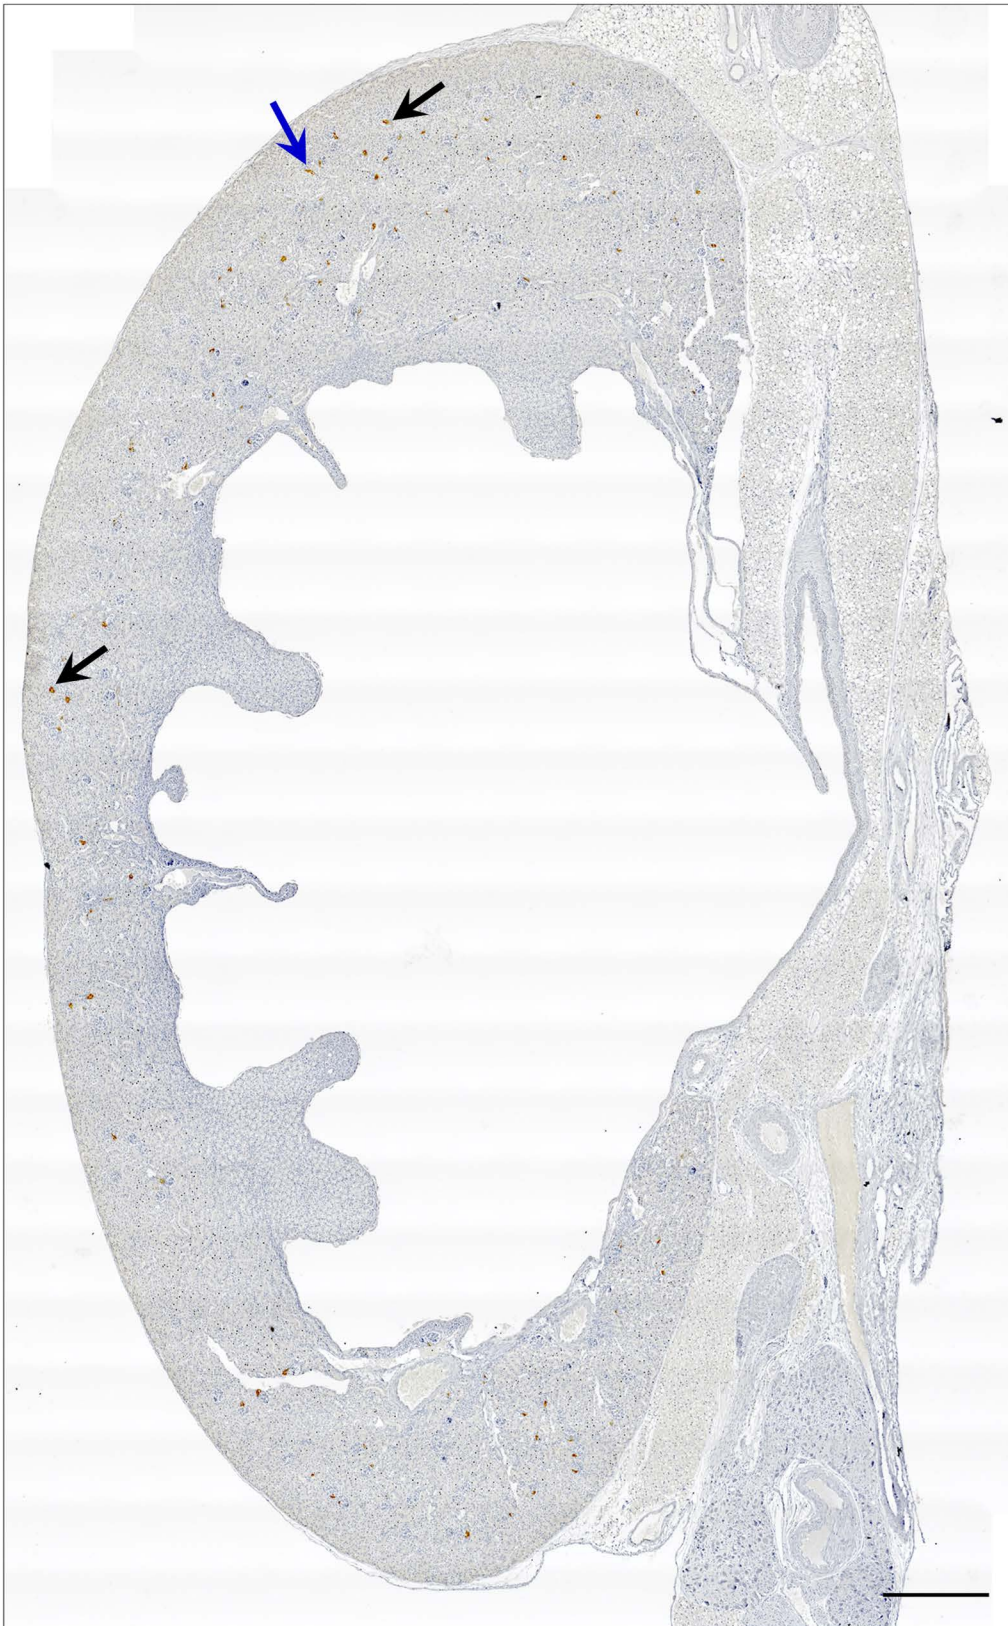

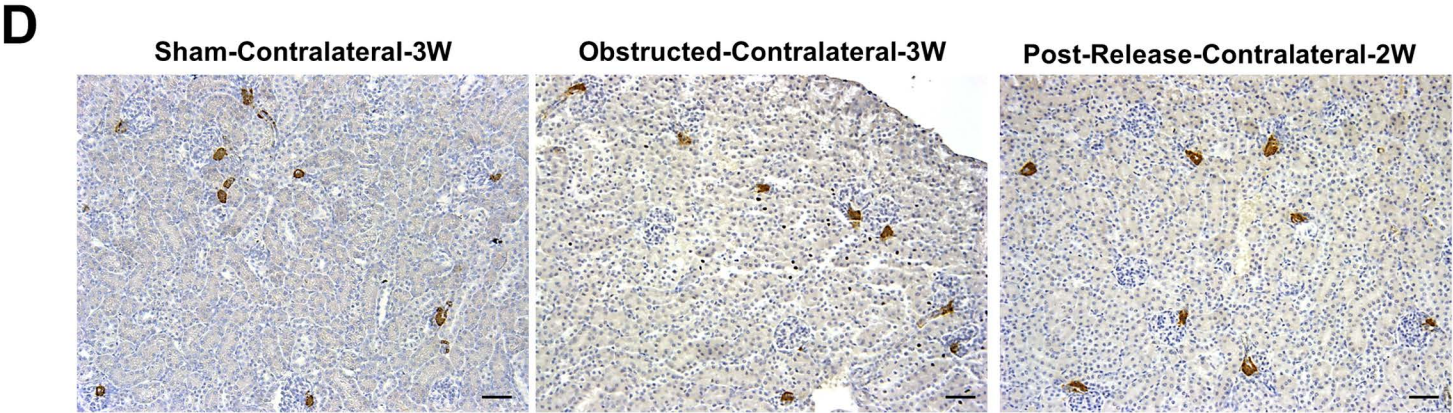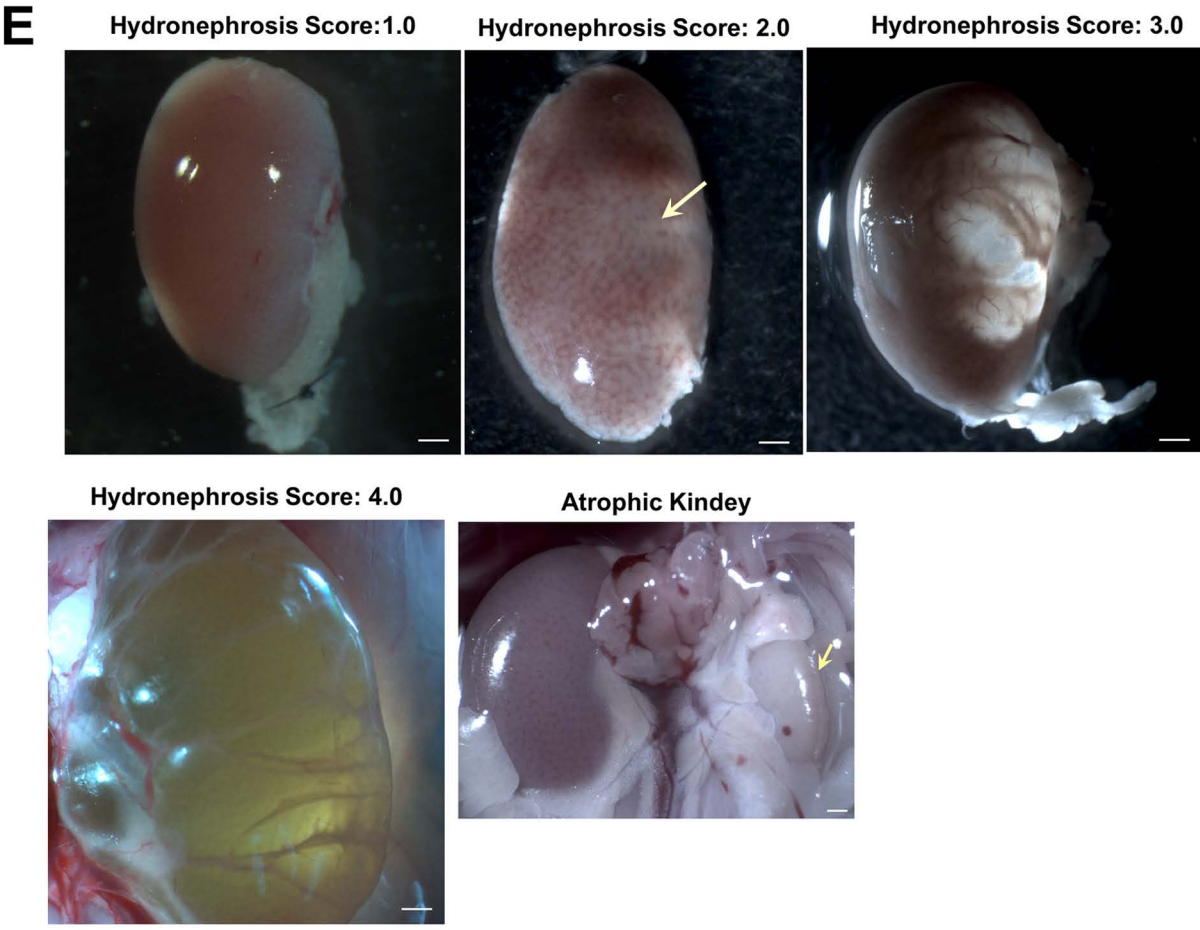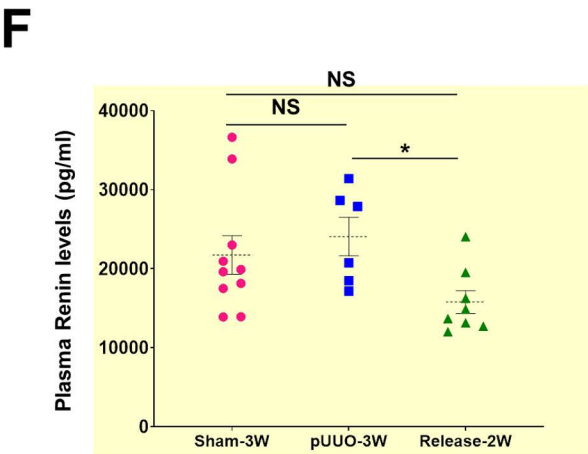

Supplement: NIHMS1909147-supplement-Fig_S1.pdf [file NIHMS1909147-supplement-Fig_S1.pdf]

A

WT

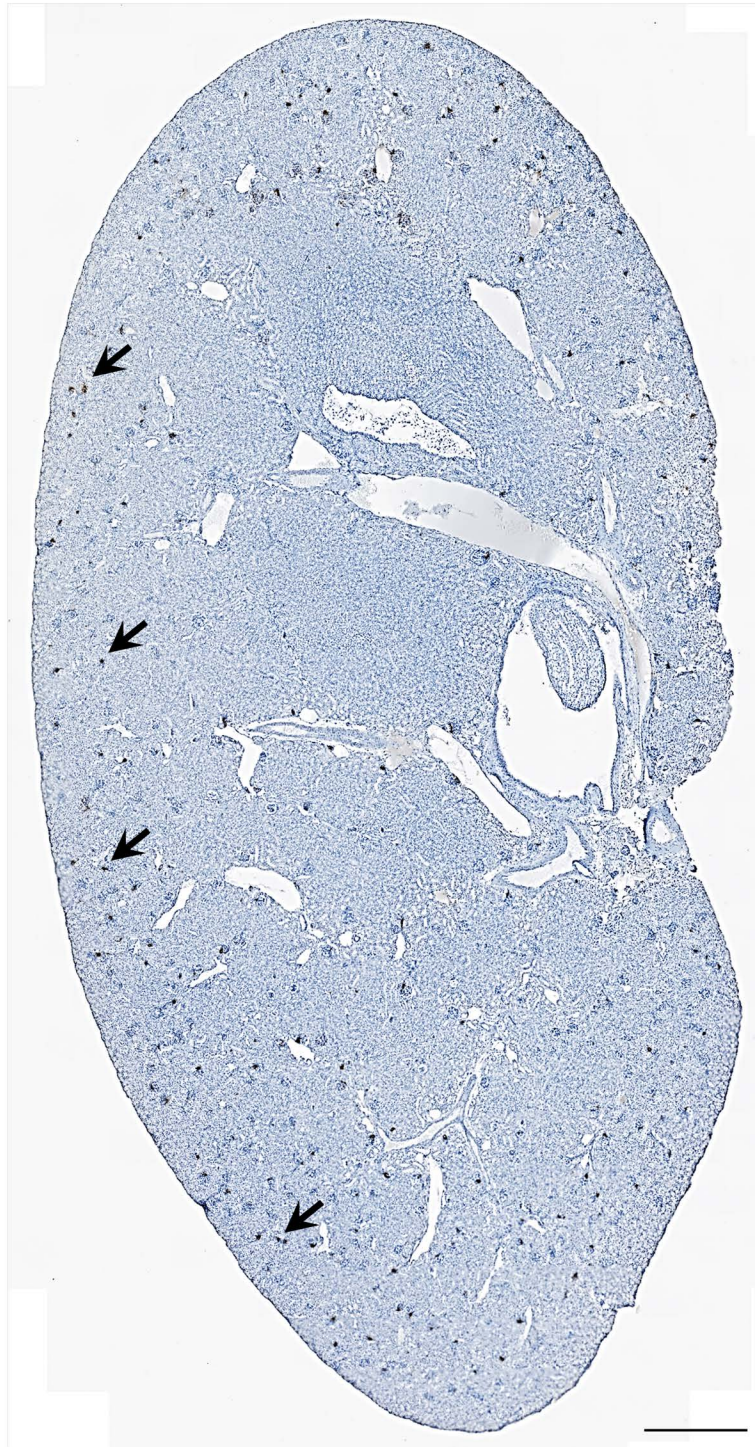

B

*Ren1<sup>d</sup>-DTA*

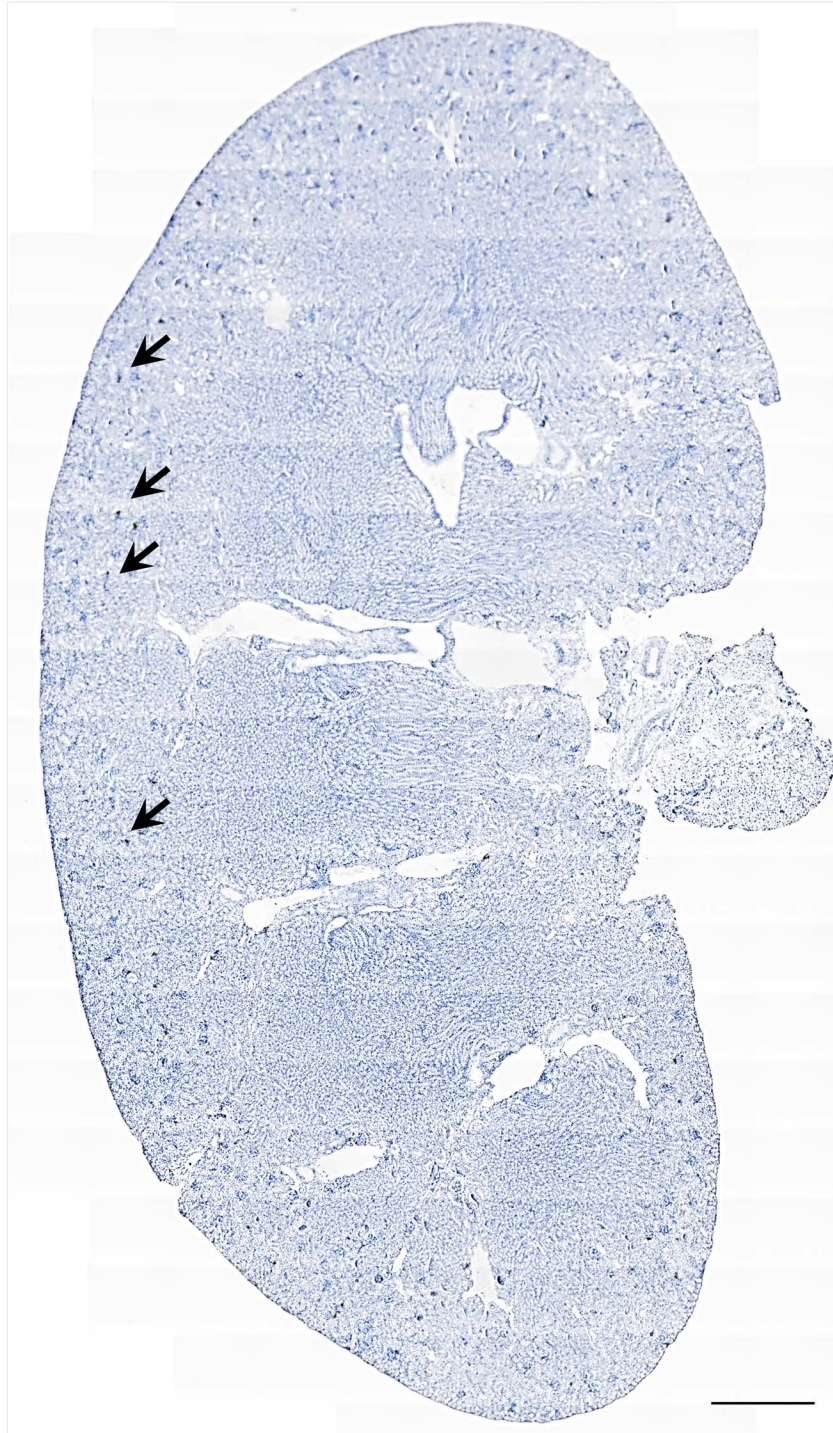



C

***Ren1<sup>d</sup>Cre;ROSA-DTA***

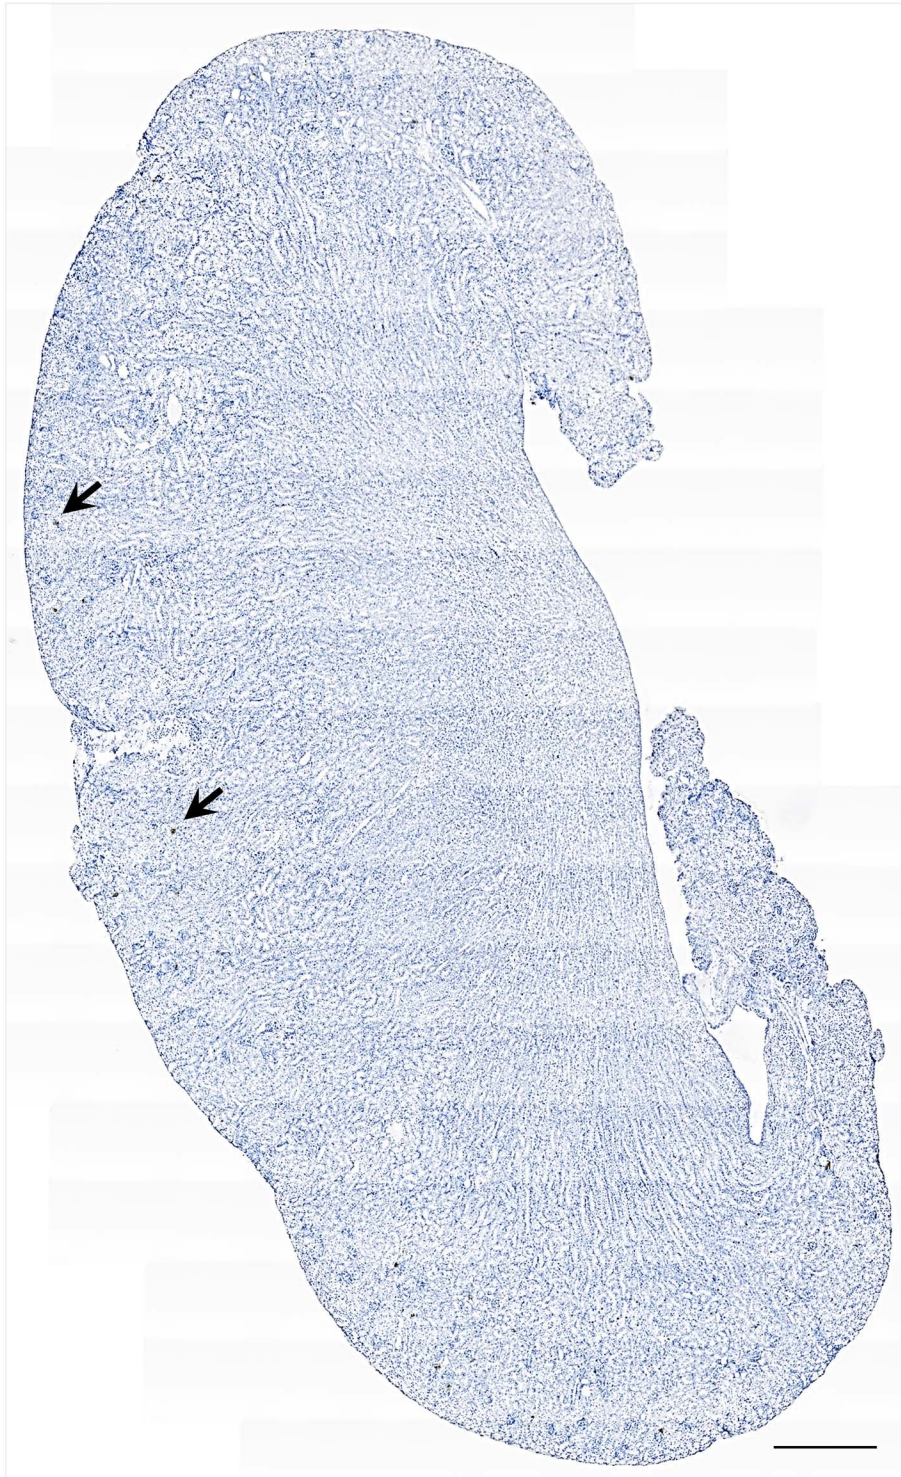

D

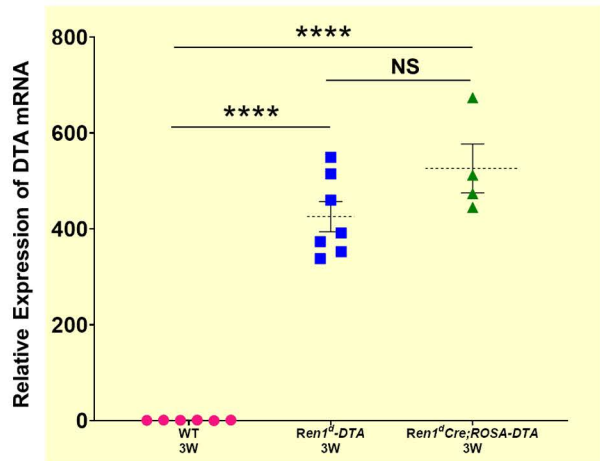

Supplement: NIHMS1909147-supplement-Fig_S3.pdf [file NIHMS1909147-supplement-Fig_S3.pdf]

A

WT-3W

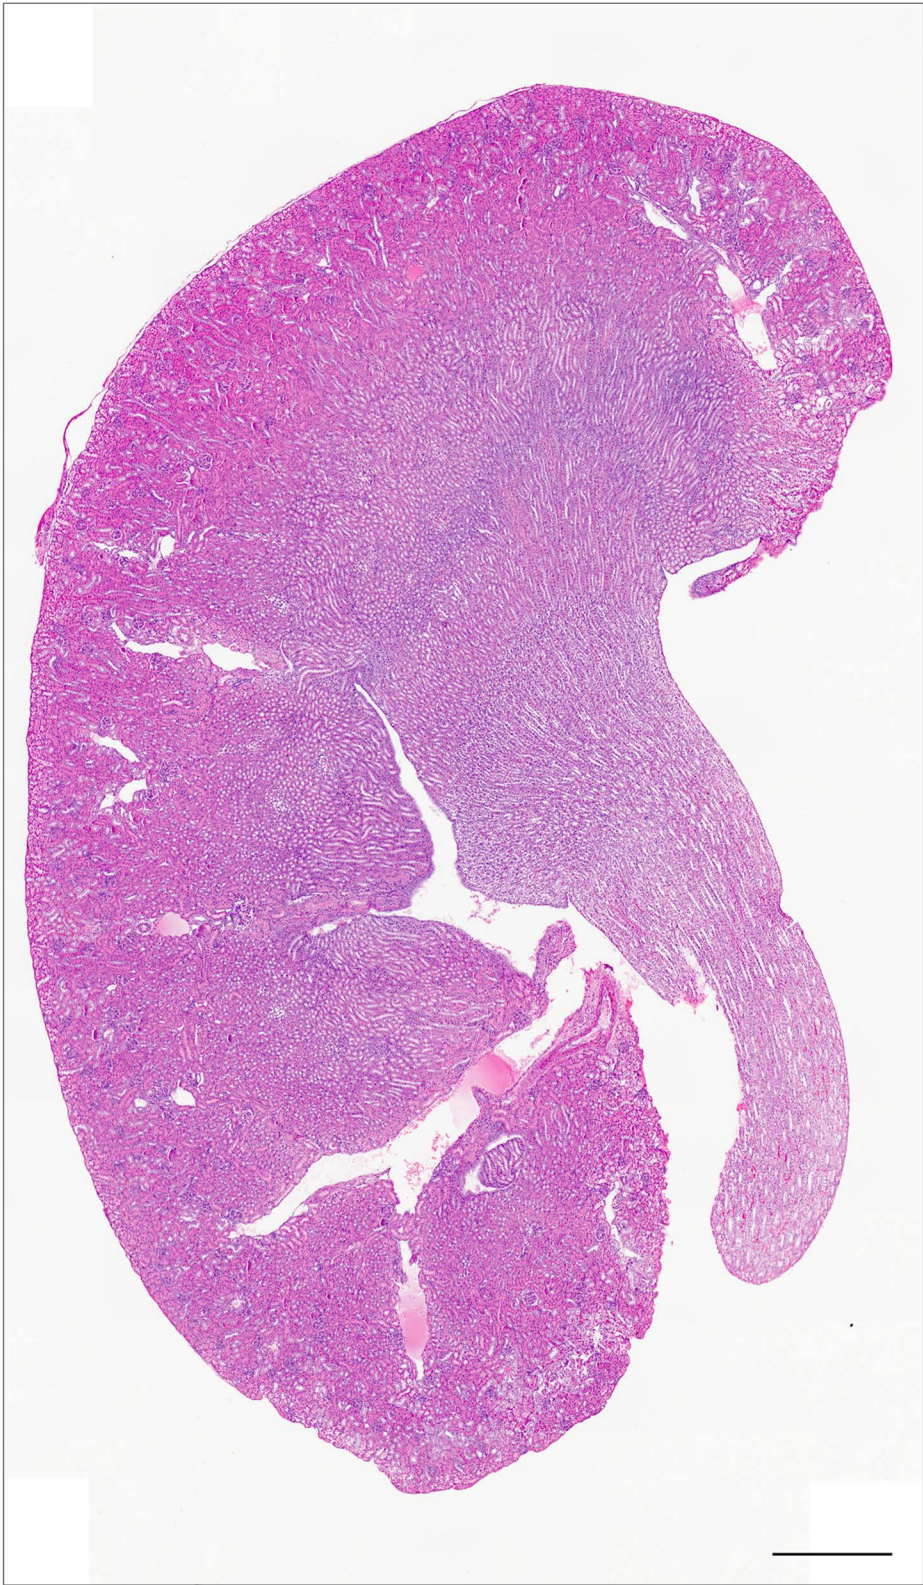



B

*Ren1<sup>d</sup>-DTA-3W*

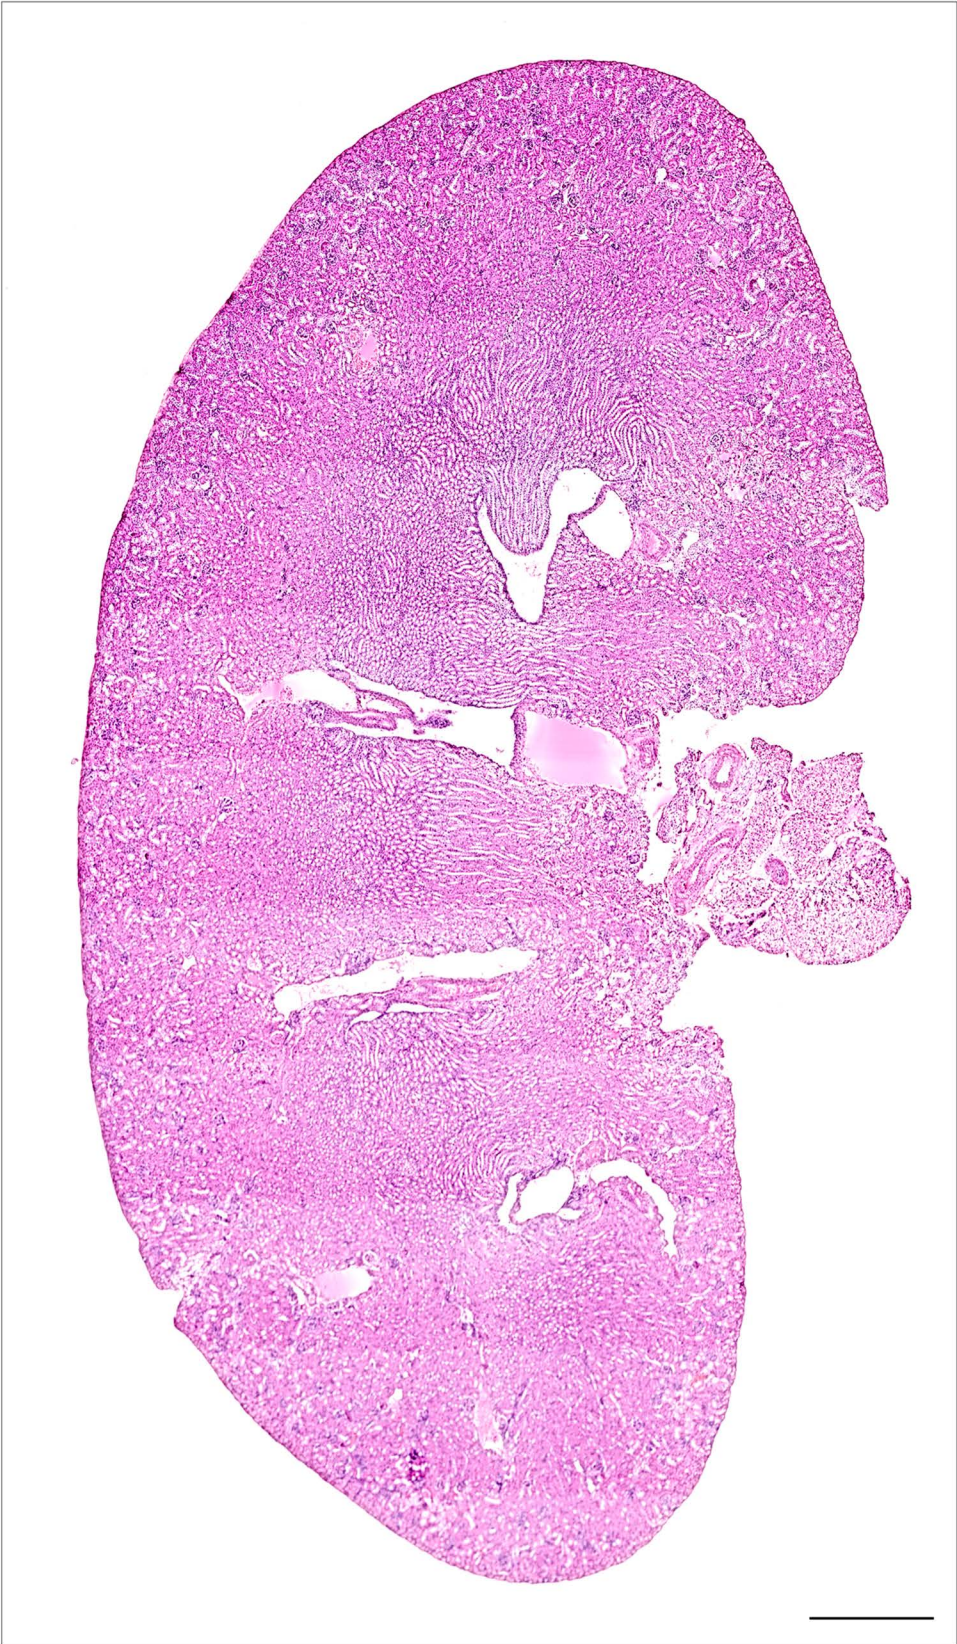



C

*Ren1<sup>d</sup>Cre;ROSA-DTA-3W*

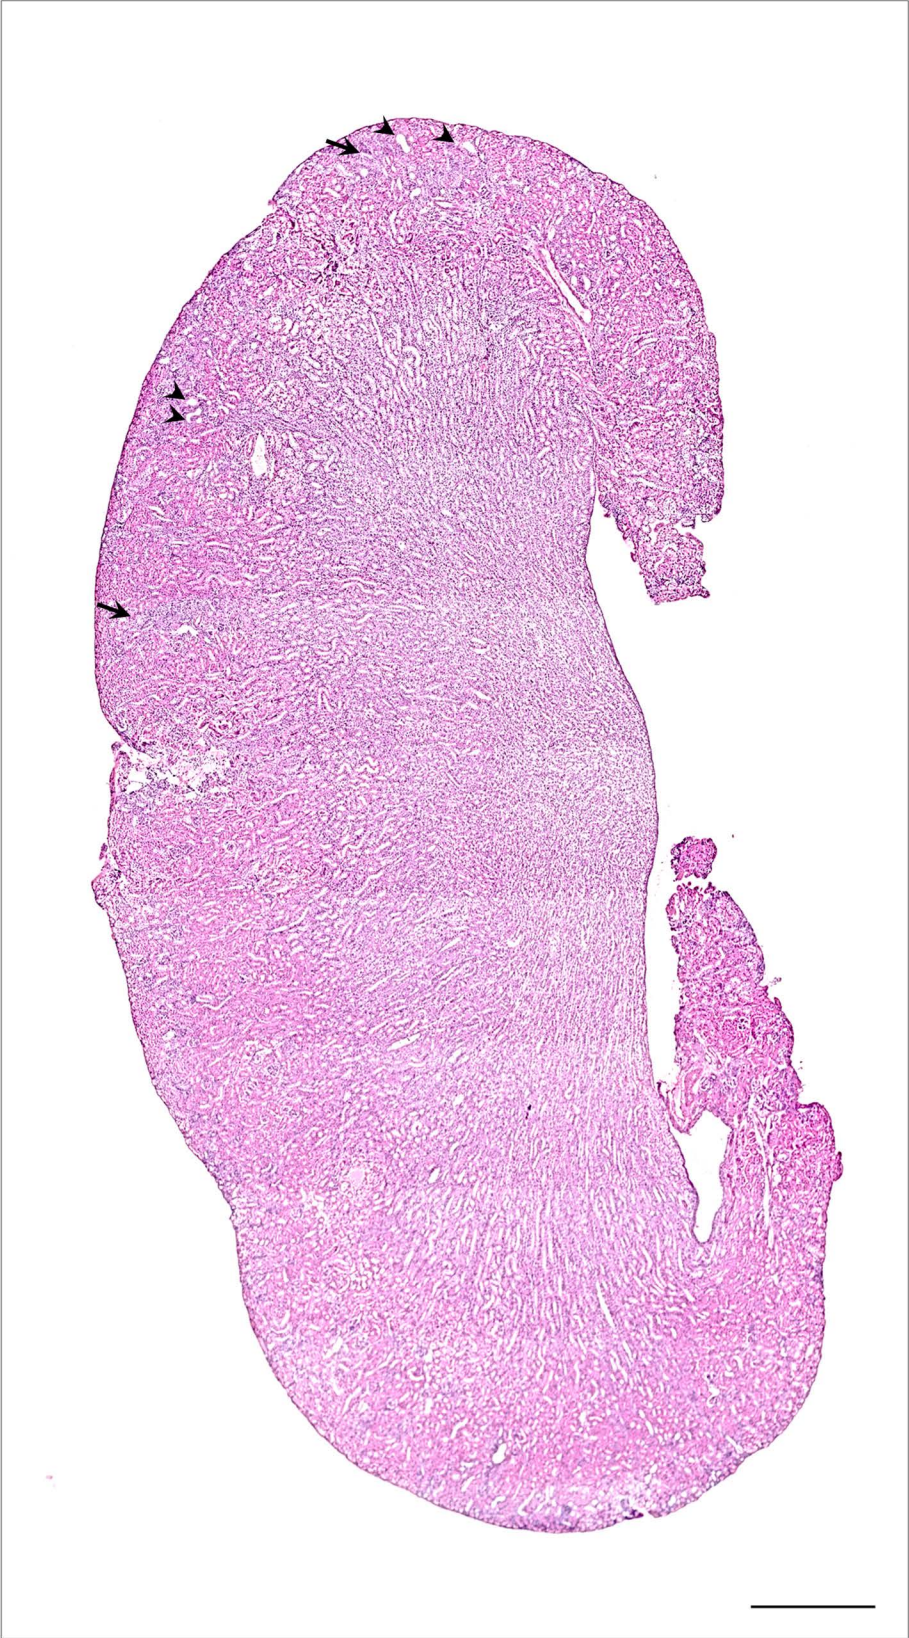

Supplement: NIHMS1909147-supplement-Fig_S5.pdf [file NIHMS1909147-supplement-Fig_S5.pdf]

**A**

**WT-3W**

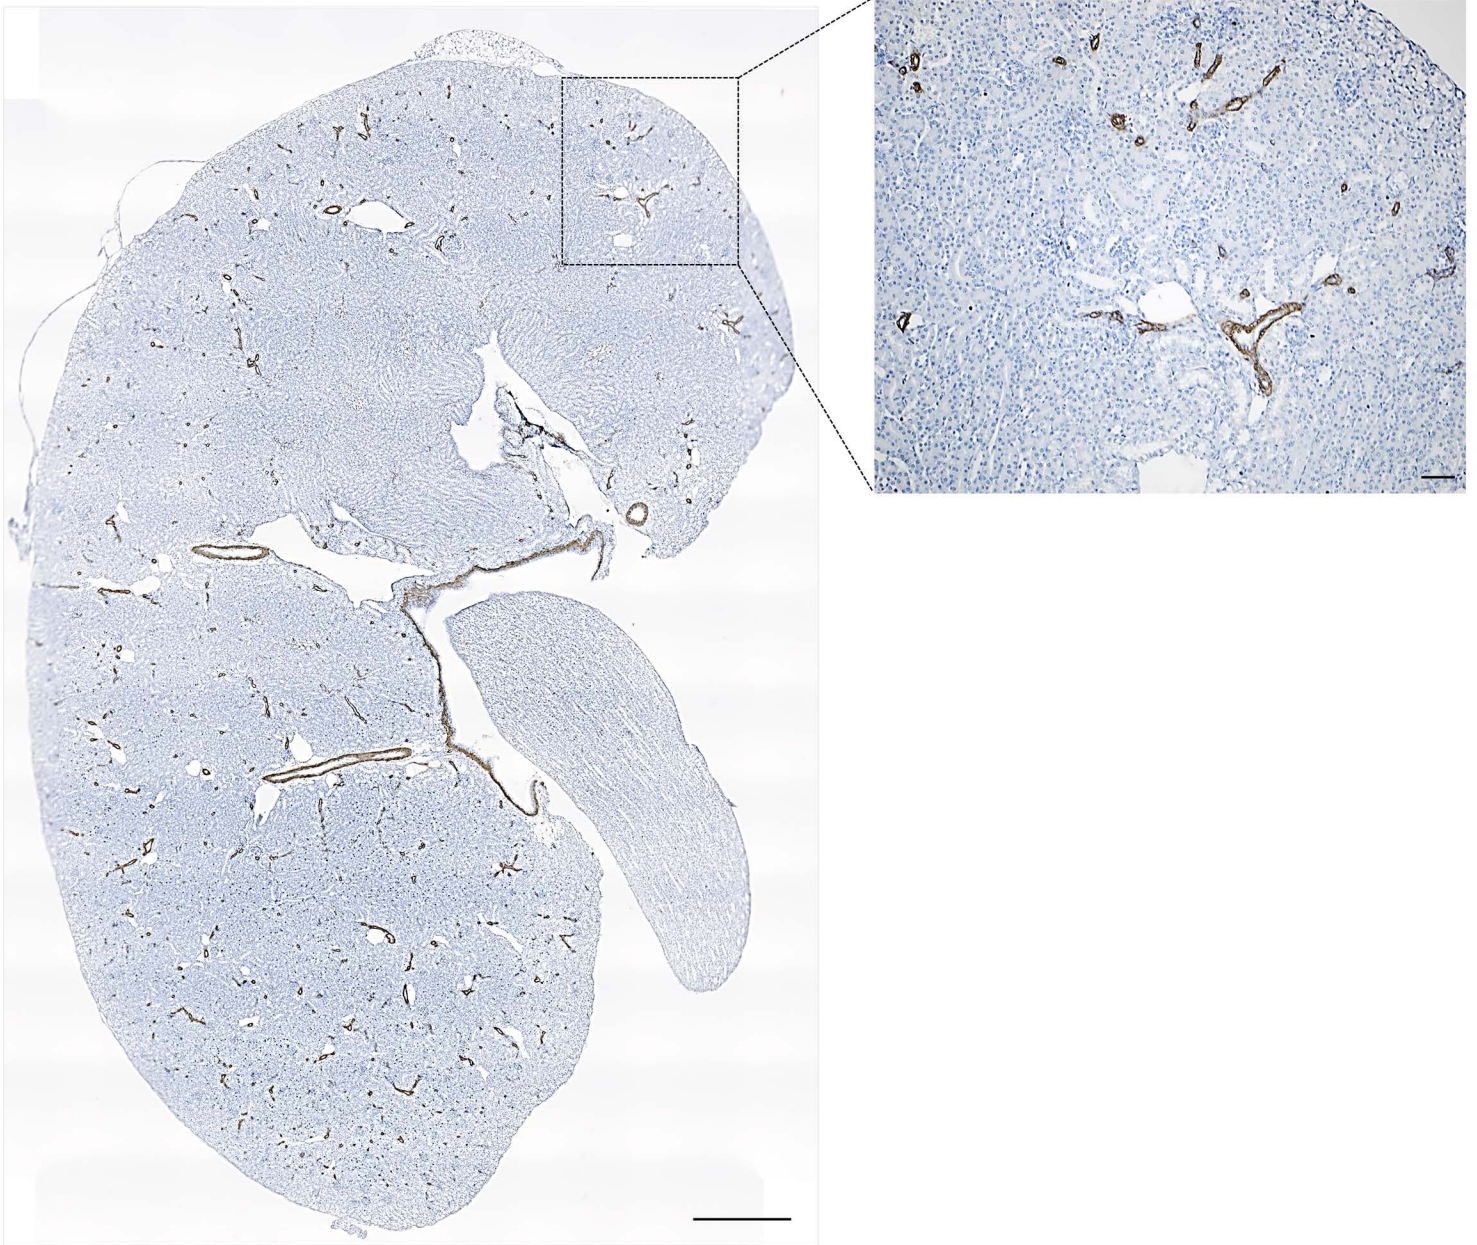



**B**

***Ren1<sup>d</sup>-DTA-3W***

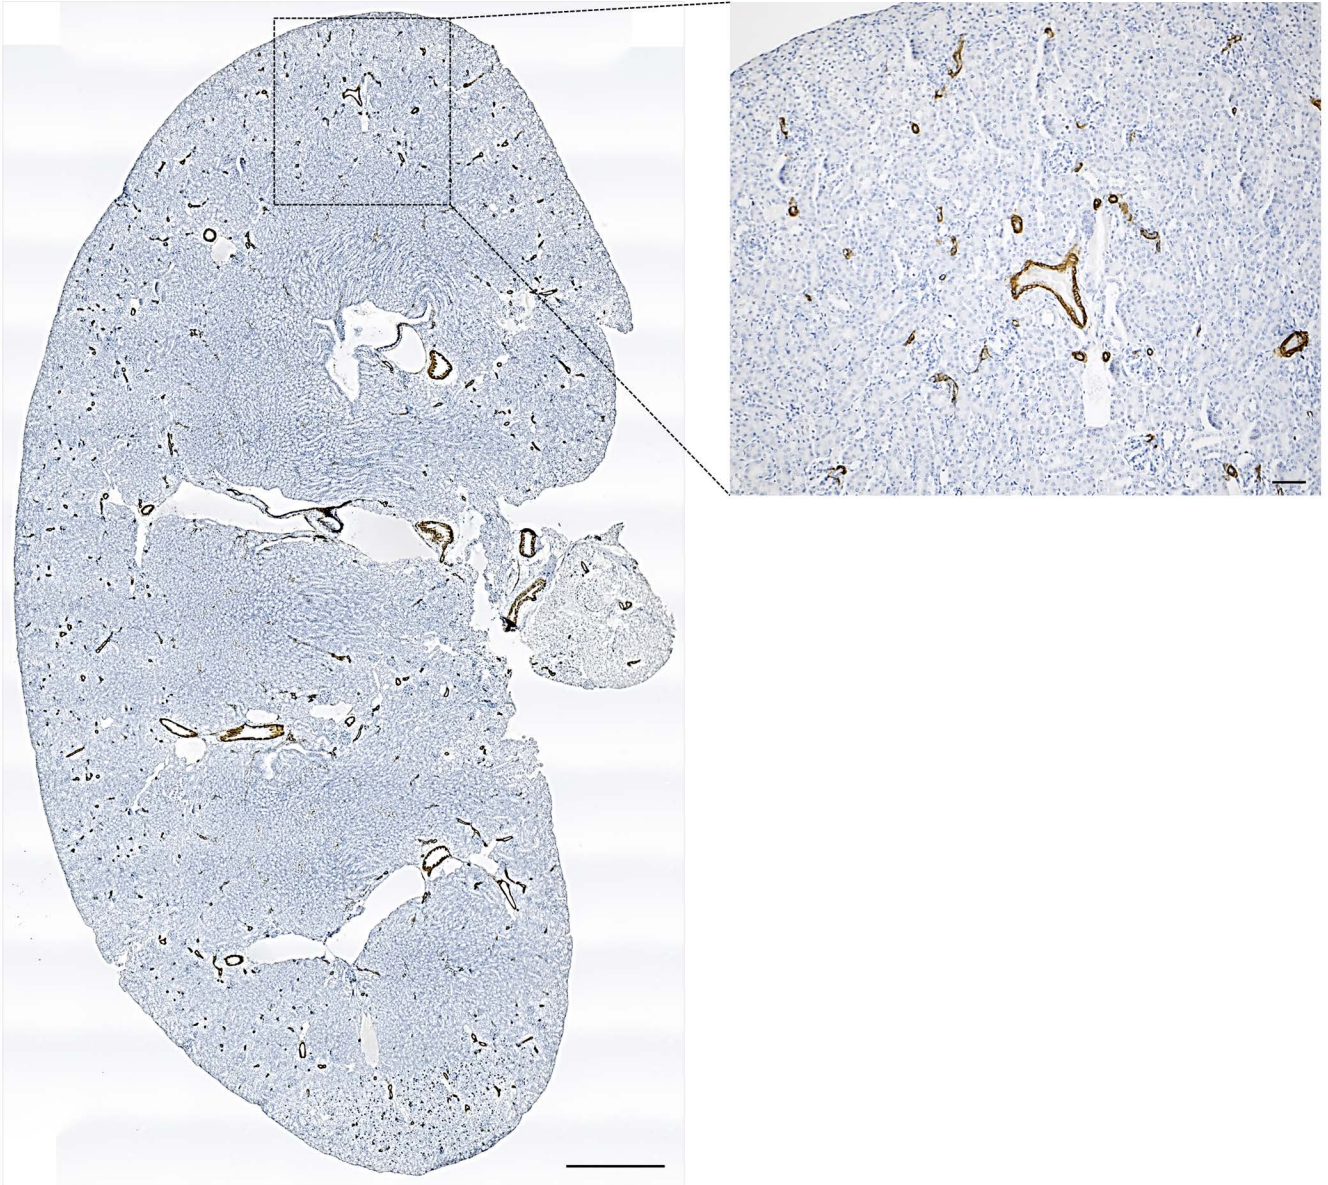



C

*Ren1<sup>dCre</sup>;ROSA-DTA-3W*

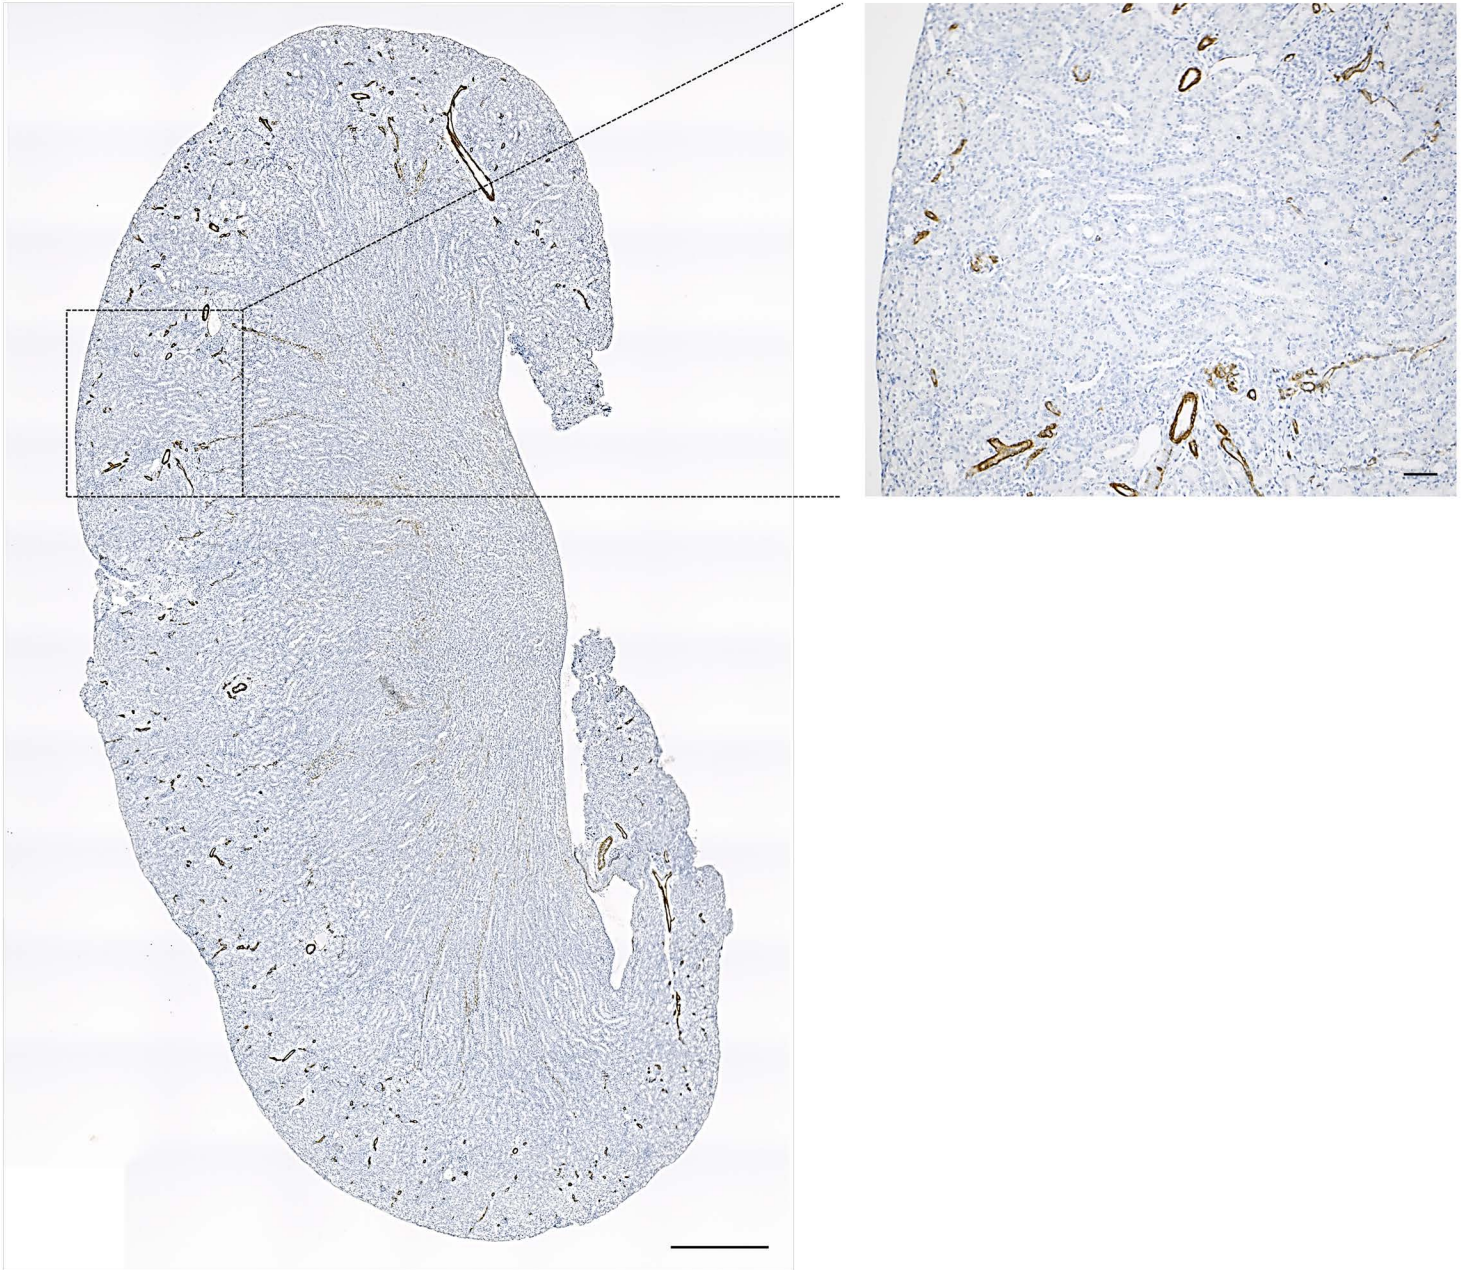

D

Supplementary Figure 6

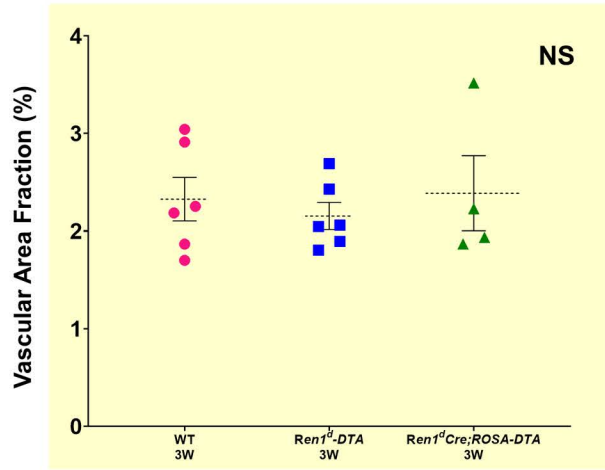

Supplement: NIHMS1909147-supplement-Fig_S6.pdf [file NIHMS1909147-supplement-Fig_S6.pdf]

**A**

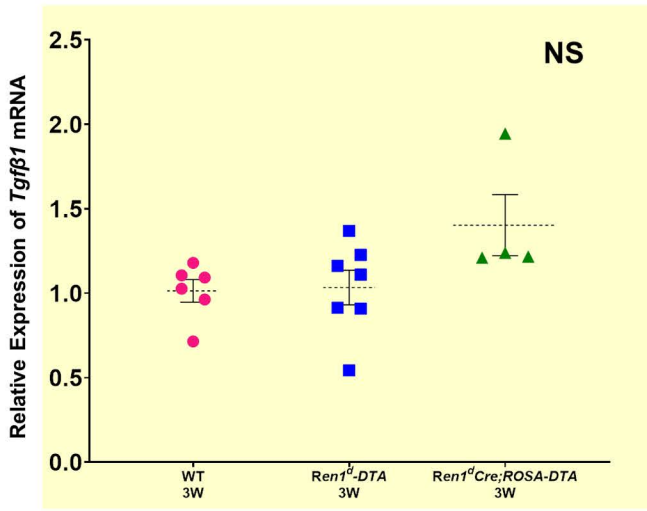

**B**

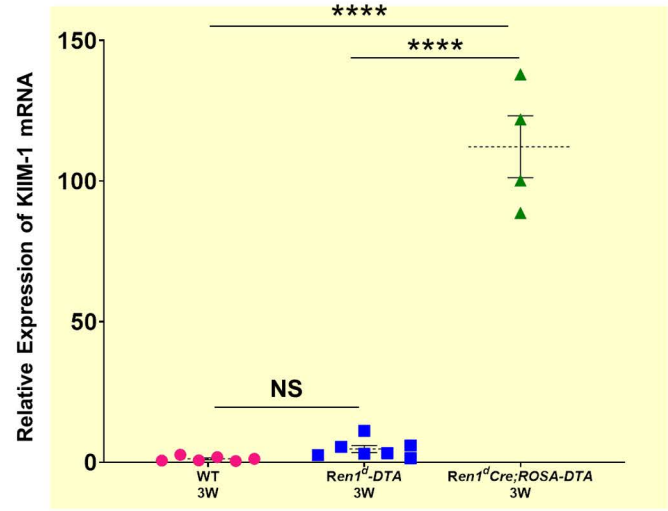

**C**

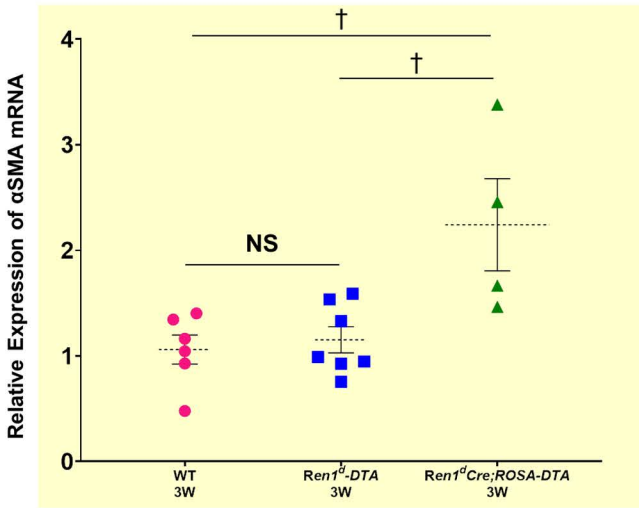

**D**

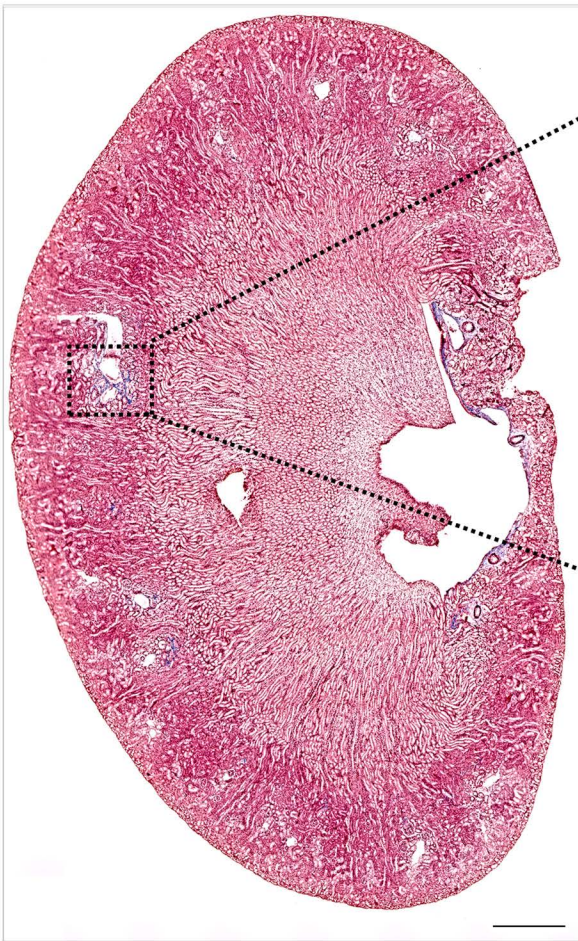

**WT**

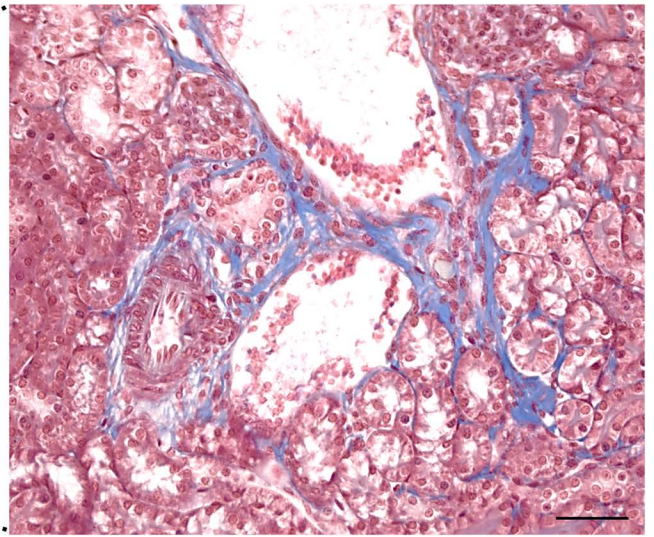

**E**

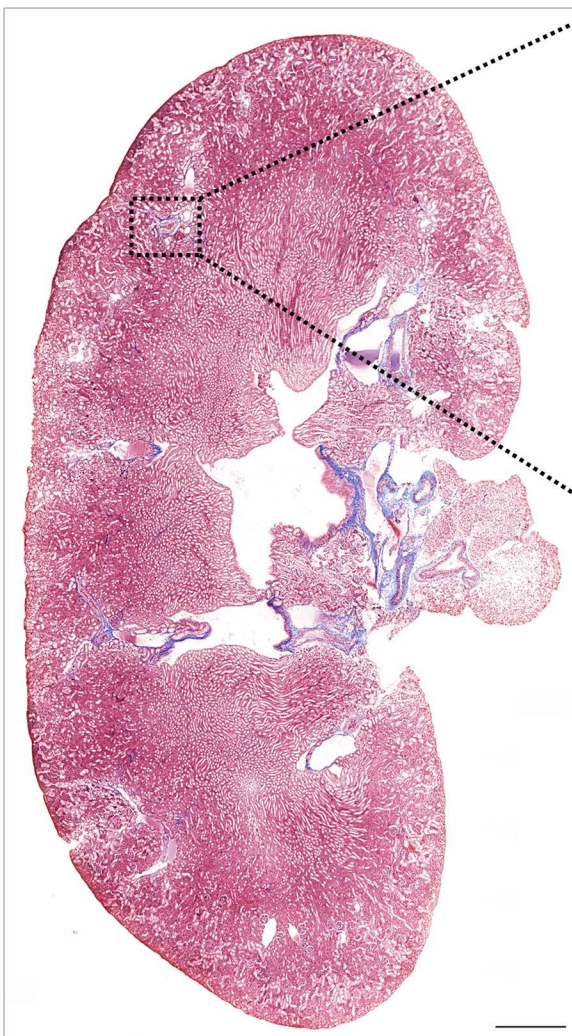

***Ren1<sup>d</sup>-DTA***

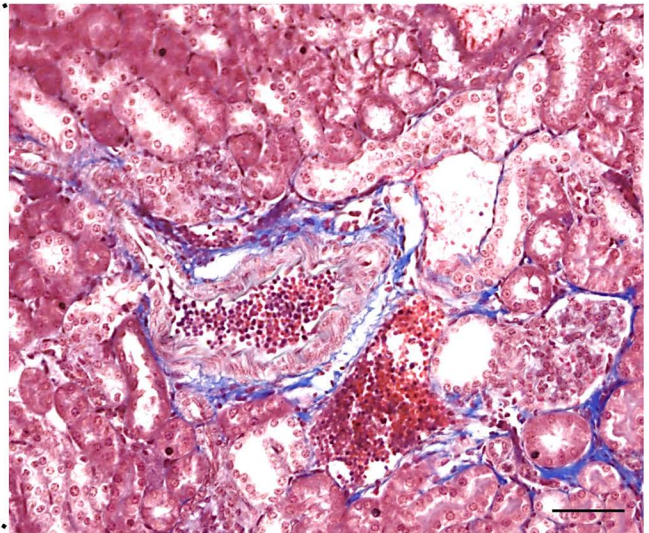



**F**

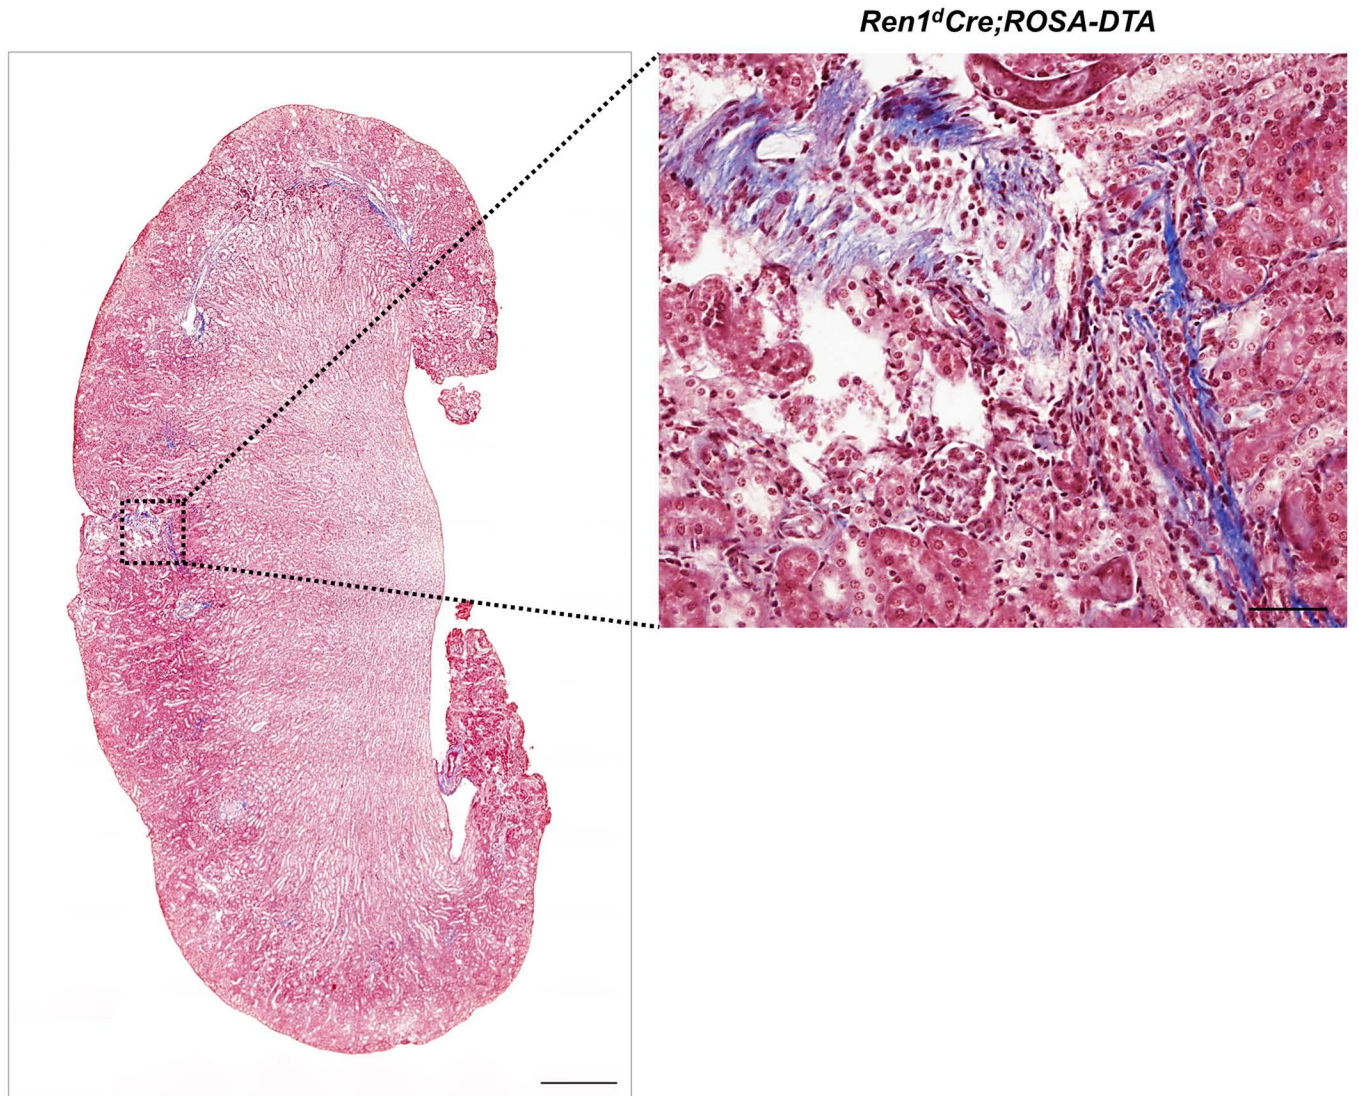

**G**

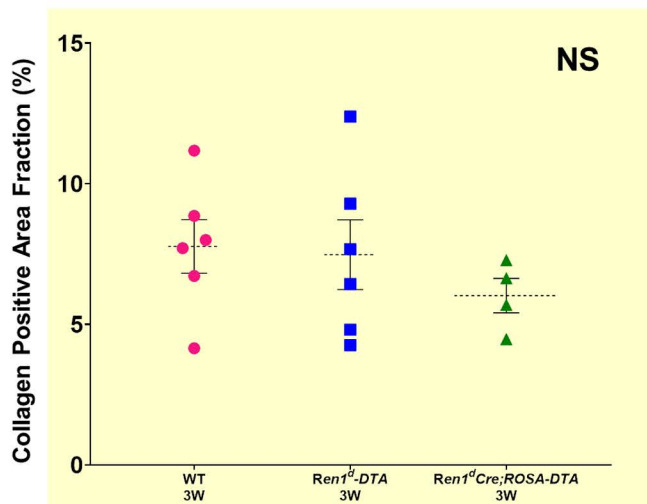

Supplement: NIHMS1909147-supplement-Fig_S7.pdf [file NIHMS1909147-supplement-Fig_S7.pdf]
